# Supplementary material
Source: Elsevier journal article supplement (https://www.sciencedirect.com/science/article/pii/S0300289623000364)
Supplement: mmc1 [file S0300289623000364:mmc1.pdf]

---

# RECOMENDACIONES GOLD 2023:

## RESUMEN EJECUTIVO

---

Àlvar Agustí,<sup>1\*</sup> Bartolome R. Celli,<sup>2\*</sup> Gerard J. Criner,<sup>3</sup> David Halpin,<sup>4</sup>  
Antonio Anzueto,<sup>5</sup> Peter Barnes,<sup>6</sup> Jean Bourbeau,<sup>7</sup> MeiLan K. Han,<sup>8</sup>  
Fernando J. Martínez,<sup>9</sup> María Montes de Oca,<sup>10</sup> Kevin Mortimer,<sup>11</sup> Alberto Papi,<sup>12</sup>  
Ian Pavord,<sup>13</sup> Nicolas Roche,<sup>14</sup> Sundeep Salvi,<sup>15</sup> Don D. Sin,<sup>16</sup> Dave Singh,<sup>17</sup>  
Robert Stockley,<sup>18</sup> M.<sup>a</sup> Victorina López Varela,<sup>19</sup> Jadwiga A. Wędzicha<sup>6</sup>  
y Claus F. Vogelmeier<sup>20</sup>

\*Co-autores principales

1. Universidad de Barcelona, Hospital Clínic, IDIBAPS y CIBERES.
2. Hospital Brigham and Women's, Escuela Harvard de Medicina, Boston (Massachusetts, Estados Unidos).
3. Escuela de Medicina Lewis Katz, Universidad Temple, Filadelfia (Pensilvania, Estados Unidos).
4. Universidad de Exeter, Escuela de Medicina y Salud, Exeter, Devon (Reino Unido).
5. Sistema de Salud para Veteranos de South Texas, Universidad de Texas, Health San Antonio (Texas, Estados Unidos).
6. Instituto Nacional de Cardiología y Neumología, Imperial College, Londres (Reino Unido).
7. Centro de Salud de la Universidad McGill de Montreal (Canadá).
8. Universidad de Michigan, Ann Arbor (Estados Unidos).
9. Centro Médico Weill Cornell y Hospital Presbiteriano de Nueva York (Estados Unidos).
10. Hospital Universitario de Caracas, Universidad Central de Venezuela, Centro Médico de Caracas (Venezuela).
11. Hospitales Universitarios de Liverpool, Consorcio Hospitalario del Sistema Británico de Salud; Instituto Nacional de Cardiología y Neumología, Imperial College (Londres); Escuela de Medicina Clínica, Colegio de Ciencias de la Salud, Universidad de Kwazulu-Natal (Sudáfrica).
12. Universidad de Ferrara (Italia).
13. Unidad de Medicina Respiratoria y Centro de Investigaciones Respiratorias del Instituto Nacional de Cardiología y Neumología, Departamento Nuffield de Medicina, Universidad de Oxford (Reino Unido).
14. Servicio de Neumología, Hospital Cochin (Asistencia Pública, Hospitales de París), Universidad de París - Centro (Francia).

15. Fundación Pulmocare de Investigación y Educación (PURE), Pune (India).
16. Hospital Saint Paul, Universidad de la Columbia Británica, Vancouver (Canadá).
17. Universidad de Manchester (Reino Unido).
18. Hospital Universitario de Birmingham (Reino Unido).
19. Universidad de la República, Hospital Maciel, Montevideo (Uruguay).
20. Departamento de Medicina, Servicio de Medicina Intensiva y Neumología, Centro Médico Universitario de Giessen y Marburgo, Universidad de Marburgo, Centro Alemán de Investigaciones Neumológicas (DZL), Marburgo (Alemania).

**Correspondencia:** Dr. Àlvar Agustí. Instituto Respiratorio, Clínic Barcelona, C/ Villarroel, 170, 08036 Barcelona. Tel.: +34 93 227 1701; e-mail: [aagusti@clinic.cat](mailto:aagusti@clinic.cat)

---

## Introducción

---

La Iniciativa Global para la Enfermedad Pulmonar Obstructiva Crónica (GOLD) ha publicado recientemente el informe GOLD 2023, que puede descargarse gratuitamente de su web ([www.goldcopd.org](http://www.goldcopd.org)), junto con una «guía de bolsillo» y una «serie de diapositivas para docencia»<sup>1</sup>. Esta versión incorpora 387 referencias bibliográficas nuevas y contiene cambios importantes respecto a las recomendaciones anteriores<sup>1</sup>. A continuación se presenta un resumen ejecutivo del informe GOLD 2023<sup>1</sup> prestando especial atención a aquellos aspectos que: *a*) son relevantes para la práctica clínica; y *b*) actualizan la información científica publicada desde el anterior resumen ejecutivo de 2017.

---

## Nueva definición de EPOC

---

Una enfermedad debe definirse únicamente por las características que la distinguen de otras entidades nosológicas<sup>2</sup>. En este sentido, el informe GOLD 2023 propone una nueva definición de EPOC que, a diferencia de documentos anteriores<sup>3</sup>, atiende exclusivamente a tales características, sin entrar en su epidemiología, causas, factores de riesgo y criterios de diagnóstico, que son analizados por separado más adelante.

Así pues, GOLD 2023 define la EPOC como un «trastorno pulmonar heterogéneo, caracterizado por síntomas respiratorios crónicos (disnea, tos, expectoración y/o agudizaciones) secundarios a alteraciones de las vías respiratorias (bronquitis, bronquiolitis) y/o los alvéolos (enfisema) que provocan obstrucción al flujo aéreo persistente y a menudo (pero no siempre) progresiva»<sup>4</sup>.

---

## Patogenia: causas y factores de riesgo

---

La EPOC es el resultado final de una serie de interacciones dinámicas, acumulativas y a veces repetidas entre los genes del individuo (G) y su entorno (E) a lo largo del tiempo (T) que dañan los pulmones o alteran su desarrollo o proceso de envejecimiento normal («GETómica»)<sup>4</sup>.

### Factores de riesgo ambientales

El **tabaquismo** es un factor de riesgo ambiental para EPOC muy importante. Los fumadores de cigarrillos tienen mayor prevalencia de síntomas respiratorios y alteraciones de la función pulmonar, una tasa anual más alta de pérdida de FEV<sub>1</sub> y una mayor mortalidad por EPOC que los no fumadores<sup>5</sup>; aun así, menos del 50% de los fumadores desarrollan EPOC<sup>6</sup>. La exposición pasiva al humo del cigarrillo y otros productos de tabaco (p. ej., pipa, puro, narguile)<sup>7-9</sup>, así como a la marihuana<sup>10</sup>, también son factores de riesgo de EPOC<sup>11</sup>. Fumar durante el embarazo conlleva un riesgo para el feto, ya que altera el crecimiento y desarrollo pulmonar intrauterino, y posiblemente

sensibilice al sistema inmunitario a presentar respuestas anómalas o intensificadas más adelante<sup>4-12</sup>.

En los países de renta baja y media, la **EPOC de no fumadores** representa hasta el 60-70% de los casos<sup>13</sup>. Como más del 85% de todos los casos de EPOC se dan en estos países, los factores de riesgo distintos del tabaquismo suman más del 50% de la carga mundial de EPOC<sup>13</sup>. La quema de leña, excrementos de animales, residuos agrícolas y/o carbón (biomasa) en fogones precarios puede comportar niveles muy altos de contaminación doméstica<sup>14</sup>, asociada con un mayor riesgo de EPOC, aunque no está claro hasta qué punto esta asociación se explica por la contaminación del aire doméstico o por otras exposiciones relacionadas con la pobreza<sup>15,16</sup>. En comparación con la EPOC de los fumadores, la EPOC en no fumadores es más frecuente entre las mujeres jóvenes, que presentan síntomas respiratorios similares (o más leves) pero una afectación parecida de la calidad de vida. Los índices espirométricos son parecidos, pero hay afectación de las pequeñas vías aéreas; también tienen menos enfisema y un deterioro menos acusado de la función pulmonar con el tiempo. Por último, sus cifras de neutrófilos circulantes son menores, la de eosinófilos en esputo es mayor<sup>13</sup> y se observa el mismo defecto de la fagocitosis de bacterias patógenas por parte de los macrófagos que en pacientes fumadores con EPOC<sup>17</sup>. Todavía hay que esclarecer si las intervenciones destinadas a reducir la contaminación aérea doméstica reducen el riesgo de EPOC y cuál es la farmacoterapia más adecuada en los pacientes con EPOC no fumadores<sup>13</sup>.

La **exposición laboral** a polvos orgánicos e inorgánicos, sustancias químicas y emanaciones es una causa infravalorada de factor de riesgo ambiental para la EPOC<sup>18,19</sup>. Según la III Encuesta Estadounidense de Salud y Nutrición, la fracción de la EPOC atribuible a las exposiciones laborales es del 19,2% en total y del 31,1% entre las personas que nunca han fumado<sup>20</sup>.

La **contaminación aérea**, que normalmente se compone de partículas en suspensión, ozono, óxidos de nitrógeno o azufre, metales pesados y otros gases de efecto invernadero, es una causa de EPOC importante en todo el mundo, responsable de cerca del 50% del riesgo de EPOC en los países de renta baja y media<sup>1</sup>. El riesgo que supone la contaminación aérea para las personas depende de la dosis, y en apariencia no existe un umbral inocuo. Incluso en los países cuya contaminación aérea ambiental es relativamente baja, la exposición crónica a partículas finas (<2,5 micras) y dióxidos de nitrógeno altera significativamente el crecimiento pulmonar de los niños<sup>21</sup>, acelera el deterioro de la función pulmonar de los adultos y acrecienta el riesgo de EPOC, sobre todo entre las personas que ya tienen otros factores de riesgo<sup>22</sup>. La contaminación aérea también aumenta el riesgo de agudizaciones, hospitalizaciones y mortalidad por EPOC<sup>23</sup>.

### Factores de riesgo genéticos

El factor de riesgo genético mejor conocido son mutaciones del gen *SERPINA1* que producen un **déficit de  $\alpha_1$ -antitripsina**, glucoproteína con efecto inhibitorio sobre las serina-proteasas en la circulación<sup>24</sup>. El genotipo *PiZZ* afecta al 0,12% de los pacientes

con EPOC y su prevalencia se encuentra entre 1/408 en la Europa septentrional y 1/1274 en la Europa oriental<sup>25</sup>. Si no fuman, los individuos heterocigotos (MZ y SZ) no tienen mayor riesgo de EPOC<sup>26</sup>.

Hay otras variantes genéticas que también se han asociado con una disminución de la función pulmonar y un mayor riesgo de EPOC; aunque el efecto que tiene cada una por sí sola es escaso, su presencia simultánea puede incrementar la propensión a la enfermedad<sup>27</sup>.

### Trayectorias de la función pulmonar: desarrollo y envejecimiento del pulmón

Al nacer, los pulmones no están del todo desarrollados y, en condiciones normales, siguen creciendo hasta alcanzar un pico de función pulmonar en torno a los 20-25 años (antes en las mujeres)<sup>5</sup>. A continuación, se produce una meseta relativamente corta seguida de un lento declive debido al envejecimiento pulmonar fisiológico. Esta trayectoria de función pulmonar normal puede verse alterada por procesos que tengan lugar en la gestación, el parto, la infancia y/o la adolescencia y que afecten al crecimiento y maduración pulmonar (y por tanto a la función máxima alcanzada), y/o por procesos que acortan la meseta o aceleran el envejecimiento pulmonar<sup>28</sup>. En consecuencia, en la población general se observan diferentes trayectorias de la función pulmonar a lo largo de la vida<sup>28</sup>. Las trayectorias por debajo de la normalidad se asocian a una mayor prevalencia e incidencia precoz (10 años antes) de multimorbilidad así como a mortalidad prematura<sup>29</sup>, mientras que las superiores a la normalidad se asocian con un envejecimiento más saludable, menos patología cardiorrespiratoria y mayor supervivencia<sup>30,31</sup>.

Los denominados «factores de desventaja infantil» como la prematuridad, peso bajo al nacer, tabaquismo materno durante la gestación, infecciones respiratorias reiteradas y mala alimentación, entre otros determinan la función pulmonar máxima que alcanza una persona<sup>32-39</sup>. Una reducción de la función pulmonar máxima en la juventud incrementa el riesgo de EPOC en etapas posteriores<sup>21,40,41</sup>. De hecho, alrededor del 50% de los pacientes desarrollan EPOC por una reducción acelerada del FEV<sub>1</sub>, en tanto que el otro 50% la desarrollan por un crecimiento y desarrollo anómalo del pulmón (aunque la reducción progresiva de la función pulmonar sea normal)<sup>42</sup>.

### Sexo

La prevalencia de la EPOC en los países desarrollados hoy en día es casi idéntica entre hombres y mujeres<sup>43</sup>. Sin embargo, las mujeres presentan más disnea, peor estado de salud y mayor incidencia de agudizaciones, aun cuando la obstrucción al flujo aéreo es similar<sup>44</sup>.

## Nivel socioeconómico

La pobreza y el bajo nivel socioeconómico se asocian con obstrucción al flujo aéreo<sup>45</sup> y mayor riesgo de EPOC<sup>46</sup>. Es probable que esta asociación refleje la exposición a contaminantes en el aire doméstico y en exteriores, hacinamiento, mala alimentación, infecciones y otros factores asociados al nivel socioeconómico bajo.

## Asma

Muchos estudios señalan que el asma y la atopia en la primera infancia pueden ser importantes factores de riesgo de EPOC en la edad adulta<sup>47,48</sup>. Cabe recordar, no obstante, que el desarrollo pulmonar anómalo en la infancia y la adolescencia puede provocar síntomas similares al asma (disnea, sibilancias, tos). Puesto que las deficiencias del desarrollo pulmonar se asocian con la EPOC en la edad adulta (ver antes), algunos de estos niños y adolescentes pueden haber recibido un diagnóstico incorrecto de «asma».

## Infecciones

Las infecciones respiratorias graves en la infancia se asocian con una reducción de la función pulmonar y un incremento de la sintomatología respiratoria en la edad adulta<sup>47,49</sup>. En los adultos, la infección bronquial crónica, sobre todo por *Pseudomonas aeruginosa*, se asocia con un declive acelerado del FEV<sub>1</sub><sup>50</sup>. En muchas zonas del mundo, la tuberculosis<sup>51</sup> y la infección por el VIH<sup>52</sup> también son factores de riesgo importantes de EPOC.

---

## Diagnóstico: espirometría forzada

---

Debe *sospecharse* el diagnóstico de EPOC en cualquier paciente que refiera disnea, tos o expectoración crónicas, antecedentes de infecciones recurrentes de las vías respiratorias bajas o exposición a los factores de riesgo descritos anteriormente. Sin embargo, **el diagnóstico de EPOC debe confirmarse mediante espirometría forzada que demuestre la existencia de obstrucción al flujo aéreo ( $FEV_1/FVC < 0,7$ ) después broncodilatación**. El valor de FEV<sub>1</sub> también sirve para determinar la gravedad de la **obstrucción de las vías respiratorias** (GOLD 1, 2, 3, 4; o leve, moderada, grave y muy grave). Sin embargo, deben tenerse en cuenta también los siguientes aspectos.

En primer lugar, la presencia de obstrucción no reversible al flujo aéreo no es específica de EPOC. También puede darse en otras enfermedades como asma entre otras. Por ello es fundamental *valorar el contexto clínico y los factores de riesgo* descritos anteriormente para establecer el diagnóstico de EPOC.

En segundo lugar, si el cociente FEV<sub>1</sub>/FVC post-broncodilatación se sitúa entre 0,60 y 0,80 en una única espirometría, este valor deberá confirmarse repitiendo la espirometría

en otro momento ya que, en este rango, se pueden producir fluctuaciones<sup>53,54</sup>. Si en la primera espirometría el cociente FEV<sub>1</sub>/FVC es inferior a 0,6, es muy poco probable que después aumente espontáneamente por encima de 0,7<sup>53</sup>.

En tercer lugar, existe un debate abierto sobre si, para el diagnóstico de EPOC, es preferible utilizar una relación FEV<sub>1</sub>/FVC fija < 0,7 o un valor variable en relación a su límite inferior de la normalidad (LIN). Como ya hacía en ediciones anteriores, GOLD 2023 continúa recomendado un cociente fijo inferior a 0.7, porque es sencillo (la simplicidad es crucial en un contexto de sobrecarga asistencial), no depende de valores de referencia, se relaciona con variables medidas en el mismo individuo y se ha utilizado en todos los ensayos clínicos que respaldan las recomendaciones terapéuticas. Sin embargo, dado que el cociente FEV<sub>1</sub>/FVC es mayor en personas jóvenes y disminuye con la edad, GOLD 2023 reconoce que puede infra-diagnosticar pacientes jóvenes y sobrediagnosticar personas mayores<sup>55,56</sup>. Sin embargo, hay que tener en cuenta que los valores del LIN se derivan de la distribución normal de la variable que quiera medirse y, por tanto, siempre clasifican al 5% inferior de la población como patológica (con razón clínica o sin ella). Además, los valores del LIN dependen directamente de las ecuaciones de referencia que se utilicen, varían con el sexo y la etnia, no hay estudios longitudinales que validen el uso del LIN y el uso de un cociente fijo no es inferior al LIN en cuanto al pronóstico<sup>57</sup> del paciente. Por último, el riesgo de diagnóstico erróneo y sobretratamiento de un paciente al tomar la relación fija como criterio es limitado, ya que la espirometría no es más que una determinación biológica para confirmar el diagnóstico clínico de EPOC que, como se ha comentado anteriormente, debe tener en cuenta además el contexto clínico (síntomatología y factores de riesgo).

En cuarto lugar, aunque para el *diagnóstico* de EPOC se requiere una espirometría post-broncodilatación, no se recomienda valorar el grado de reversibilidad de la obstrucción al flujo aéreo para tomar decisiones terapéuticas<sup>58</sup>. Esta reversibilidad varía con el tiempo en un mismo paciente y diferencia EPOC de asma ni predice la respuesta al tratamiento con broncodilatadores o corticoides<sup>59</sup>. Por todo ello, no es necesario ni aconsejable<sup>1</sup> retirar la medicación broncodilatadora inhalada antes de obtener determinaciones espirométricas en el *seguimiento* de los pacientes ya tratados.

Finalmente, también hay controversia en torno a la utilidad de la espirometría como herramienta de cribado de EPOC en la población general. En personas asintomáticas sin exposición significativa al tabaco u otros factores de riesgo, la espirometría probablemente no esté indicada como herramienta de cribado. En cambio, si hay síntomas o factores de riesgo (p. ej., más de 20 años de consumo de una cajetilla diaria, infecciones respiratorias recurrentes, prematuridad u otros factores infantiles destacables), el rendimiento diagnóstico de la espirometría es relativamente alto por lo que debe valorarse la espirometría como método para la detección precoz de casos<sup>1</sup>.

---

## Terminología

---

Como se ha discutido anteriormente, existen diversas trayectorias de función pulmonar a lo largo de la vida<sup>28,60</sup> y la EPOC puede deberse a desarrollo anómalo del pulmón y/o envejecimiento acelerado<sup>42</sup>. Todo ello ha generado cierta confusión terminológica, por lo que GOLD 2023 propone la siguiente nomenclatura<sup>1</sup>.

### EPOC inicial (“early”)

El término “inicial” indica cercanía al comienzo de un proceso. Dado que la EPOC puede aparecer en las primeras etapas de la vida y tardar mucho tiempo en manifestarse clínicamente, es difícil detectar la EPOC «inicial». Por ello, hay que distinguir su comienzo biológico, relacionado con los mecanismos iniciales que causan EPOC, del comienzo clínico, marcado por la primera percepción de los síntomas, de la limitación funcional o de las alteraciones estructurales. Por tanto, GOLD propone usar el término «EPOC inicial» (en inglés, “*early COPD*”) para hablar únicamente del debut biológico de la enfermedad en un contexto experimental.

### EPOC leve

En algunos estudios se utiliza la obstrucción al flujo aéreo «leve» como variable indicativa de EPOC inicial<sup>61</sup>. Esto es incorrecto, ya que no todos los pacientes parten de una función pulmonar máxima normal en su juventud, es decir, algunos nunca padecen una forma «leve» de la enfermedad en cuanto a la gravedad de la obstrucción al flujo aéreo<sup>28</sup>. Además, las formas «leves» pueden producirse a cualquier edad y pueden progresar, o no, con el tiempo<sup>60</sup>. Por consiguiente, la GOLD propone reservar el calificativo «leve» (en inglés, *mild*) para describir la gravedad de la obstrucción al flujo aéreo medida mediante espirometría sin hacer ninguna asunción *a priori* sobre su relación con el eje temporal.

### EPOC en jóvenes

El término «EPOC en jóvenes» (en inglés, *young COPD*) parece claro, porque se refiere directamente a la edad cronológica del paciente<sup>62</sup>. Como la función pulmonar alcanza su punto máximo en torno a los 20 años<sup>5</sup> y comienza a menguar entre los 40 y los 50, GOLD propone utilizar el término «EPOC en jóvenes» para pacientes de 20-50 años<sup>63</sup>, lo que puede incluir tanto a los que nunca alcanzaron una función pulmonar pico normal en la juventud como a los que no necesariamente es “leve” ya que presentan una meseta más corta o un deterioro más rápido de la función pulmonar<sup>64,65</sup>. Es importante destacar, no obstante, que la EPOC en pacientes «jóvenes» puede asociarse con alteraciones pulmonares estructurales y funcionales importantes que tienen un impacto sustancial en su nivel de salud<sup>65,66</sup>. Un porcentaje significativo de jóvenes con EPOC refiere antecedentes familiares de enfermedades respiratorias y antecedentes relevantes en la infancia (en particular, hospitalizaciones antes de los cinco años)<sup>65</sup>.



## Pre-EPOC

El término «pre-EPOC» se refiere a individuos de cualquier edad que presentan síntomas respiratorios u otras alteraciones estructurales (p. ej., enfisema) y/o funcionales (p. ej., hiperinsuflación pulmonar, reducción de la capacidad de difusión pulmonar o pérdida acelerada de FEV<sub>1</sub>) sin obstrucción al flujo aéreo en la espirometría (FEV<sub>1</sub>/FVC > 0,7 post broncodilatación)<sup>67</sup>. Algunos, pero no todos estos pacientes, pueden evolucionar con el tiempo y presentar obstrucción al flujo aéreo no reversible (es decir, EPOC)<sup>67</sup>. En cualquier caso, sin embargo, las personas con pre-EPOC de acuerdo a esta definición deben considerarse ya «pacientes», porque sufren síntomas o presentan alteraciones funcionales o estructurales. Actualmente no hay evidencia científica disponible sobre cual es el mejor tratamiento para estos pacientes<sup>68</sup>, por lo que urge acometer ensayos clínicos aleatorizados y controlados, tanto en pacientes con pre-EPOC como en jóvenes con EPOC<sup>69</sup>.

## PRISm

Se ha propuesto el término «PRISm» (acrónimo inglés de *Preserved Ratio, Impaired Spirometry*) para designar a las personas cuya relación FEV<sub>1</sub>/FVC es  $\geq 0,7$  pero cuyo FEV<sub>1</sub> es <80% del valor de referencia post- broncodilatación<sup>70,71</sup>. Su prevalencia oscila entre el 7,1% y el 20,3% de la población<sup>71</sup>, es particularmente alta entre fumadores activos y exfumadores y se asocia con una mayor mortalidad por cualquier causa<sup>71</sup>, pero especialmente de origen cardiovascular. Con el tiempo, estos pacientes con PRISm pueden mantenerse estables o evolucionar hacia una alteración espirométrica obstrucción o no obstructiva<sup>71</sup>. Todavía existen numerosos interrogantes sobre la patogenia y tratamiento de PRISm<sup>71</sup>.

---

## Taxonomía

---

GOLD 2023 propone por vez primera una nueva clasificación (taxonomía) de la EPOC atendiendo a las diferentes causas (o *etiotipos*) que la pueden originar (figura 1), basada en dos propuestas recientes<sup>2,72</sup>. Esta propuesta todavía no tiene un impacto clínico directo pero pretende alertar sobre la EPOC no relacionada con el tabaquismo y estimular la investigación sobre sus mecanismos, diagnóstico, prevención y tratamiento de estos otros etiotipos de EPOC que son muy prevalentes a nivel global<sup>13</sup>.

---

## Presentación clínica

---

Los enfermos de EPOC pueden referir disnea, tos con o sin expectoración, sibilancias, opresión torácica, fatiga, y algunos sufren episodios agudos, denominados agudizaciones o exacerbaciones, que se caracterizan por el empeoramiento abrupto de los síntomas respiratorios y que requieren medidas preventivas y terapéuticas específicas. Es habitual que haya otras enfermedades concurrentes (multimorbilidad) que influyen en la situación clínica y el pronóstico<sup>73</sup>, con independencia de la gravedad

de la obstrucción al flujo aéreo<sup>73</sup>, y que igualmente requieren tratamiento específico (ver más adelante).

---

## Evaluación inicial del paciente

---

Una vez confirmado el diagnóstico de EPOC mediante espirometría, la evaluación inicial del paciente tiene por objeto orientar su tratamiento. Para ello es necesario: 1) determinar la gravedad de la obstrucción al flujo aéreo (grados espirométricos GOLD basados en el valor de FEV<sub>1</sub>); 2) definir la naturaleza y la magnitud de los síntomas; 3) conocer los antecedentes de agudizaciones moderadas y graves como mejor indicador del riesgo de agudizaciones futuras; y 4) determinar si hay multimorbilidad y de qué tipo.

### Evaluación inicial combinada: de «ABCD» a «ABE»

Debido al impacto clínico de las agudizaciones, sea cual sea el nivel de síntomas del paciente<sup>75</sup>, GOLD 2023 modifica la herramienta de evaluación inicial «ABCD» de las ediciones anteriores<sup>74</sup> y propone una clasificación de tres grupos (ABE) (figura 2). El grupo E (“exacerbaciones”) es el resultado de la fusión de los anteriores grupos C y D. Los umbrales propuestos para los síntomas (eje de abscisas) y los antecedentes de agudizaciones en el último año (eje de ordenadas) no cambian respecto a los documentos GOLD anteriores, por lo que los grupos A y B siguen siendo los mismos. Este cambio afecta a las recomendaciones iniciales de tratamiento farmacológico que se discuten más adelante. El valor práctico de esta propuesta debe validarse mediante investigación clínica.

### Diagnóstico por la imagen

La **radiografía de tórax** no sirve para establecer el diagnóstico de EPOC. No obstante, algunas alteraciones radiológicas características de EPOC incluyen signos de hiperinsuflación pulmonar (aplanamiento del diafragmático y aumento del espacio retroesternal), hiperclaridad pulmonar y afilamiento periférico precoz del calibre vascular (“*prunning*”). Por otro lado, la radiografía de tórax puede ser útil para descartar otros diagnósticos (fibrosis pulmonar, bronquiectasias, pleuropatías) y/o confirmar la presencia de comorbilidades relevantes (cáncer de pulmón, cardiomegalia o cifoescoliosis).

La **TAC de tórax** puede proporcionar información de relevancia clínica, incluyendo: 1) presencia, gravedad y distribución del **enfisema** que pueden tener implicaciones de cara a una posible reducción endoscópica o quirúrgica del volumen pulmonar. El enfisema, además, se asocia a un declive más rápido del FEV<sub>1</sub>, mayor mortalidad y riesgo más elevado de cáncer de pulmón<sup>76</sup>; 2) alrededor del 30% de los enfermos de EPOC tienen **bronquiectasias** apreciables en la TAC, que se asocian con agudizaciones más frecuentes y una mayor mortalidad<sup>77</sup>; 3) la mayoría de los enfermos de EPOC reúnen los criterios de inclusión y exclusión para el **cribado del cáncer de pulmón** en la

población general (edad y antecedentes de tabaquismo)<sup>78,79</sup>, por lo que se podría considerar una estrategia análoga<sup>1</sup>; 4) cuantificación de las **alteraciones de las vías respiratorias**, aunque estos métodos no están tan normalizados como los que se usan para cuantificar el enfisema<sup>80-82</sup>; y 5) información sobre **comorbilidades** como calcificaciones de arterias coronarias, ensanchamiento de la arteria pulmonar o pérdida de densidad ósea y masa muscular de los pectorales, algunas de las cuales se asocian con la mortalidad por cualquier causa, sea cual sea la gravedad de la obstrucción al flujo aéreo<sup>83</sup>. Por todo ello, **GOLD 2023 recomienda obtener un TAC torácico en pacientes con EPOC que presenten agudizaciones persistentes, síntomas desproporcionados para el grado de limitación del flujo aéreo, obstrucción grave del flujo aéreo con hiperinsuflación importante y atrapamiento aéreo, así como en los que reúnan los criterios para el cribado del cáncer de pulmón (básicamente EPOC en fumadores o exfumadores).**

## Tratamiento farmacológico

El tratamiento farmacológico debe acompañarse siempre de las medidas no farmacológicas que se describen a continuación, especialmente el cese del hábito tabáquico en pacientes fumadores activos.

### Elección y uso adecuado de los inhaladores

El tratamiento inhalado es fundamental en los pacientes con EPOC, por lo que es imprescindible que los diferentes inhaladores sean manejados correctamente con objeto de optimizar la relación beneficio-riesgo. Para ello, es preciso educar y formar tanto a los pacientes como a los profesionales; además, es necesario hacer revisiones periódicas de que el paciente está haciendo un uso efectivo de los mismos. En el documento GOLD 2023 íntegro se detallan aspectos importantes relativos a la elección del inhalador en relación a su disponibilidad en el mercado, las preferencias personales de los pacientes y su capacidad de realizar la maniobra inhalatoria correctamente<sup>84</sup>.

### Tratamiento farmacológico inicial

La figura 3 recoge las recomendaciones GOLD 2023 para el tratamiento farmacológico ***inicial*** (es decir, en pacientes que no han sido tratados previamente). El tratamiento recomendado en pacientes del grupo A sigue siendo el mismo que en ediciones anteriores (un broncodilatador, preferiblemente de larga acción). En cambio, GOLD 2023 recomienda que el tratamiento inicial de pacientes del grupo B debe ser el tratamiento con dos broncodilatadores de acción prolongada (un agonista adrenérgico  $\beta_2$  o LABA; y un antagonista muscarínico o LAMA), ya que esta terapia dual es más eficaz que la monoterapia y los efectos secundarios son muy escasos<sup>85-87</sup>. Para los pacientes del grupo E también se recomienda como tratamiento inicial la doble broncodilatación LAMA + LABA, excepto en aquellos enfermos que tengan  $\geq 300$  eosinófilos/ $\mu$ l en sangre, en los que puede valorarse la terapia triple (LABA + LAMA + corticoide inhalado (CI)). Se trata de una recomendación práctica, ya que no hay evidencia directa que la avalen como primera línea de tratamiento. GOLD 2023 no recomienda el uso de

LABA + CI en pacientes con EPOC. Si hay indicación de un CI, la triple terapia (LABA + LAMA + CI) es superior LABA + CI, por lo que representa la primera opción<sup>88,89</sup>. Si existe un componente de asma, se recomienda tratar al paciente siguiendo las guías clínicas de asma<sup>90</sup>.

### Tratamiento farmacológico durante el seguimiento del paciente

El efecto del tratamiento inicial debe ser siempre valorado posteriormente y modificado si es necesario. Como en ediciones anteriores, GOLD 2023 sigue recomendando que el tratamiento durante el seguimiento del paciente se base en dos rasgos tratables<sup>91</sup>: la disnea y las agudizaciones (figura 4). Estos rasgos tratables pueden coexistir en un mismo paciente<sup>92</sup> y pueden evolucionar con el tiempo por progresión de la enfermedad o respuesta terapéutica.

Si el paciente sigue teniendo **disnea** o limitación al ejercicio a pesar de la monoterapia con un broncodilatador, se recomienda utilizar LABA + LAMA; si los síntomas no mejoran a pesar de este paso, deberá valorarse un cambio de inhalador o de molécula, además de investigar y tratar otras causas de disnea.

Si el paciente sigue teniendo **agudizaciones** (con o sin disnea) a pesar de la monoterapia con un broncodilatador, se recomienda LABA + LAMA, excepto si la cifra de eosinófilos en sangre es  $\geq 300$  unidades/ $\mu$ l, en cuyo caso puede considerarse LABA + LAMA + CI. Si las agudizaciones persisten con LABA + LAMA, se recomienda escalar a LABA + LAMA + CI siempre que la cifra de eosinófilos sea  $\geq 100$  unidades/ $\mu$ l. Si las agudizaciones persisten a pesar de triple terapia, o si la cifra de eosinófilos es  $< 100$  unidades/ $\mu$ l, puede valorarse añadir roflumilast (sobre todo si hay bronquitis crónica y el FEV<sub>1</sub> es  $< 50\%$  del valor de referencia)<sup>93-95</sup> o un macrólido (especialmente si el paciente no fuma en la actualidad)<sup>96,97</sup>.

Cuando se modifique el tratamiento farmacológico, hay que seguir controlando su efecto<sup>98</sup>. Tal como se indica en la figura 4, puede valorarse una desescalada de los CI en caso de neumonía u otros efectos secundarios importantes, pero hay que tener en cuenta que si la cifra de eosinófilos en sangre es  $\geq 300$  unidades/ $\mu$ l, es más probable que la desescalada de los CI se asocie con reaparición de episodios de agudización.

Por último, si un paciente con EPOC que no tiene rasgos asmáticos pero que, por cualquier razón, está recibiendo tratamiento con LABA + CI y está bien controlado, se recomienda seguir el tratamiento este tratamiento; si no lo está y persiste disneico, se valorará pasar a LABA + LAMA; si se repiten las agudizaciones, se recomienda escalar el tratamiento a triple terapia (LABA + LAMA + CI).

### Otras cuestiones a considerar sobre el tratamiento farmacológico en la EPOC

#### *Los eosinófilos en sangre como biomarcador clínico útil*

La principal indicación de CI en la EPOC es la persistencia de agudizaciones a pesar de tratamiento con LABA+LAMA (figura 5)<sup>88,89,99-102</sup>. En este contexto, el nivel de eosinófilos en sangre es un marcador de riesgo de agudizaciones y de respuesta terapéutica a los CI. Añadir un CI tiene un efecto nulo o escaso si la cifra de eosinófilos es inferior a 100 por microlitro, mientras que  $\geq 300$  identifica pacientes con alta probabilidad de respuesta terapéutica<sup>103,104</sup>. Entre los 100 y los 300 eosinófilos por microlitro hay una gradación continua del efecto preventivo de los CI<sup>103,104</sup>. La cifra de eosinófilos es relativamente estable a lo largo del tiempo<sup>105,106</sup> por lo que pueden utilizarse valores históricos recogidos en la historia clínica del paciente.

### ***Bronquitis crónica***

Tradicionalmente se ha definido la bronquitis crónica (BC) como «tos y expectoración durante al menos tres meses por año en dos años consecutivos» (siempre que no se explique por otra causa, aspecto que tiende a olvidarse). La prevalencia de BC en enfermos con EPOC se sitúa entre el 27% y el 35%, siendo más alta en varones, individuos más jóvenes, pacientes que llevan más años fumando, los que sufren mayor obstrucción al flujo aéreo, los residentes en entornos rurales y los que tienen mayor exposición laboral. La BC en pacientes con EPOC se asocia a un declive acelerado de la función pulmonar, más agudizaciones y mayor mortalidad. El tratamiento de la BC no está bien definido pero incluye el cese del hábito tabáquico, uso de LAMA, mucolíticos orales y antioxidantes o dispositivos de presión espiratoria positiva oscilante; no se han obtenido resultados positivos con mucolíticos inhalados ni con desoxirribonucleasa humana recombinante<sup>1</sup>. Están estudiándose otras alternativas terapéuticas para la BC, como el uso de crionebulización con nitrógeno líquido, reoplastia y la denervación pulmonar dirigida.

### ***Precio de la terapia inhalada***

En los países de renta baja y media, hay pocos tratamientos inhalados esenciales para la EPOC, y su precio los hace poco asequibles; se trata de un problema de inequidad mundial que debe corregirse urgentemente para alcanzar la cobertura sanitaria universal y el objetivo de desarrollo sostenible número 3<sup>107</sup>. Por otro lado, incluso en los países desarrollados, la mayoría de los medicamentos inhalatorios siguen teniendo marca registrada y hay pocos medicamentos genéricos disponibles.

### ***Reducir el deterioro de la función pulmonar y la mortalidad en la EPOC***

La farmacoterapia puede reducir el deterioro de la función pulmonar con el tiempo en algunos pacientes<sup>1</sup>. Además, diversas intervenciones farmacológicas y no farmacológicas pueden reducir la mortalidad en EPOC (figura 6). Ello pone de manifiesto la necesidad de adoptar estrategias dirigidas de búsqueda de casos, caracterizar debidamente a los pacientes identificados y personalizar adecuadamente su tratamiento.

---

## Tratamiento no farmacológico

---

El tratamiento no farmacológico es parte esencial del manejo integral de la EPOC.

### Educación

Todos los pacientes deben ser educados sobre los aspectos básicos de su enfermedad y tratamiento (medicación y uso apropiado de inhaladores), enseñarles estrategias para minimizar la disnea e indicarles cuándo deben pedir ayuda.

### Dejar de fumar

Cerca del 40% de los pacientes con EPOC siguen fumando, lo cual tiene consecuencias muy negativas para el pronóstico y la progresión<sup>108</sup>. Debe ofrecerse ayuda y tratamiento para dejar de fumar a todos los pacientes.

### Vacunas

Se recomienda la vacunación para la gripe, la infección neumocócica, la COVID-19, la tos ferina y el herpes zóster, según las directrices vigentes en el territorio<sup>1</sup>.

### Actividad física

Los pacientes con EPOC reducen su actividad física<sup>109</sup>, por lo que se recomienda promover su actividad física<sup>110,111</sup>. Las nuevas tecnologías pueden facilitar este objetivo<sup>112</sup>.

### Rehabilitación pulmonar

La rehabilitación pulmonar, que puede hacerse en el domicilio o en centros ambulatorios, es claramente beneficiosa<sup>1</sup>. Por ello, debe recomendarse en pacientes con sintomatología importante y riesgo alto de agudizaciones (GOLD B y E)<sup>113,116</sup>.

Se ha propuesto la tele-rehabilitación como alternativa a los métodos tradicionales, algo que ha cobrado relevancia en la era de la pandemia de COVID-19, en la que no ha sido viable la rehabilitación en persona. Diversos estudios con plataformas de tele-rehabilitación diferentes (videoconferencia, sólo teléfono, web con comunicación telefónica, aplicación interactiva para móvil, etc.) indican que la tele-rehabilitación es segura y tiene beneficios equivalentes a los que se observan en programas presenciales<sup>117</sup>. Sin embargo, todavía no se ha determinado cuál es la mejor plataforma de tele-rehabilitación, su contenido o duración<sup>118,119</sup>.

## Oxigenoterapia y soporte respiratorio

Los criterios para prescribir oxigenoterapia y soporte respiratorio domiciliarios no han variado respecto a recomendaciones GOLD previas<sup>1</sup>.

## Reducción de volumen pulmonar quirúrgica y endoscópica

Para algunos pacientes con enfisema heterogéneo u homogéneo y sintomáticos que presenten hiperinsuflación significativa que no responde al tratamiento médico optimizado, se puede valorar la reducción del volumen pulmonar mediante técnicas quirúrgicas o endoscópicas (figura 7). La bullectomía puede estar indicada en pacientes que tengan bullas de gran tamaño. En pacientes jóvenes con EPOC muy grave sin contraindicaciones relevantes puede valorarse el trasplante de pulmón.

## Cuidados paliativos

En todos los pacientes con EPOC avanzada se valorarán las opciones de atención paliativa terminal, a fin de optimizar su control sintomático y permitir a los pacientes y a sus familias tomar decisiones informadas sobre su futuro.

---

# Agudizaciones de la EPOC

---

## Nueva definición

Las agudizaciones de la EPOC afectan negativamente al estado de salud, a la progresión de la enfermedad y al pronóstico<sup>120</sup>. La definición anterior que hacía la GOLD de «agudización» era muy inespecífica («empeoramiento agudo de los síntomas respiratorios que motiva la instauración de tratamiento adicional»)<sup>3</sup>. Además, la gravedad de la agudización (leve, moderada o grave) se determinaba *a posteriori* según el consumo de recursos sanitarios<sup>3</sup>, que es un parámetro inservible para orientar el tratamiento en el punto de atención. Para subsanar estas limitaciones, GOLD 2023 adopta la reciente propuesta de consenso de Roma<sup>120</sup>, que define la agudización de la EPOC como: «un episodio caracterizado por un incremento de la disnea, tos y/o expectoración que empeora en un lapso inferior a 14 días, que puede acompañarse de taquipnea y taquicardia y que suele asociarse a un incremento de la inflamación local y sistémica provocada por una infección (viral y/o bacteriana), por contaminación ambiental o por otra agresión a las vías respiratorias».

## Diagnóstico diferencial

Los pacientes con EPOC corren mayor riesgo de sufrir otros problemas agudos, especialmente insuficiencia cardíaca descompensada, neumonía o embolia pulmonar, que pueden remedar o agravar una agudización de la EPOC (figura 8), por lo que se precisa un diagnóstico diferencial adecuado (y su tratamiento específico si están presentes de forma aislada o en combinación con una agudización de EPOC)<sup>121</sup>.



## Evaluación de la gravedad de la agudización

La propuesta de Roma propone una serie de variables clínicas fáciles de obtener a fin de definir la gravedad de la agudización de la EPOC (leve, moderada o grave) (figura 8)<sup>120</sup>. En atención primaria, la gravedad puede determinarse fácilmente a partir de la intensidad de la disnea (mediante una escala visual analógica que va de 0 a 10, en la que el 0 denota ausencia de disnea y 10 la mayor disnea que jamás ha sentido el paciente), la frecuencia respiratoria, la frecuencia cardíaca y la saturación arterial de oxígeno. Si es posible, se recomienda medir los niveles de proteína C-reactiva (CRP; figura 8). Para determinar la necesidad de soporte ventilatorio (normalmente en el servicio de urgencias o en el ámbito hospitalario), es preciso obtener una gasometría arterial. Para pasar de leve a moderado en la calificación, tres de las variables deben estar por encima de los umbrales fijados (figura 8). Esta propuesta precisa validación prospectiva<sup>122</sup>. En el futuro sería deseable identificar un marcador de la lesión pulmonar más específico que la proteína C-reactiva, como ya ha ocurrido con los episodios agudos de otros órganos (p. ej., la troponina en el infarto agudo de miocardio).

## Tratamiento de las agudizaciones

### *Ámbito de tratamiento*

En función de su gravedad, así como el de la EPOC subyacente y posibles comorbilidades existentes, la agudización se puede tratar en un ámbito ambulatorio u hospitalario. Las indicaciones de tratamiento en un ámbito hospitalario son: 1) síntomas muy intensos, como empeoramiento repentino de la disnea en reposo, taquipnea, reducción de la saturación de oxígeno, confusión y disminución del nivel de conciencia; 2) insuficiencia respiratoria aguda; 3) signos físicos nuevos (p. ej., cianosis, edema periférico); 4) ausencia de respuesta al tratamiento farmacológico inicial; 5) presencia de comorbilidades graves (p. ej., insuficiencia cardíaca, arritmias nuevas, etc.); y 6) soporte insuficiente en domicilio<sup>1</sup>.

En el servicio de urgencias, si el paciente está hipoxémico se le administrará la concentración adecuada de oxígeno suplementario y se valorará si el incremento del trabajo respiratorio o la alteración del intercambio de gases requiere ventilación no invasiva. En tal caso, se procurará ingresar al paciente en una unidad donde pueda instituirse una monitorización adecuada. En casos menos graves, puede tratarse al paciente en el ámbito de urgencias o en planta.

### *Tratamiento farmacológico*

#### Broncodilatadores

Los agonistas  $\beta_2$  de acción corta (SABA), a veces asociados con anticolinérgicos de acción corta (SAMA), están indicados en el tratamiento de un episodio de agudización de la EPOC, con cámara inhalatoria si es necesario o mediante nebulización<sup>1</sup>. Si se elige un nebulizador, es preferible que éste utilice aire ambiente en vez de oxígeno, para evitar el riesgo de hipercapnia por hipoventilación<sup>123</sup>. GOLD 2023 recomienda que durante la agudización no se interrumpa el tratamiento de base con broncodilatadores de acción prolongada, o bien se re-instauran estos medicamentos en cuanto resulte posible antes del alta hospitalaria<sup>1</sup>. Las metilxantinas intravenosas (teofilina o aminofilina)



están desaconsejadas porque no aportan valor terapéutico añadido y provocan efectos secundarios importantes<sup>124,125</sup>.

### Glucocorticoides

Los glucocorticoides sistémicos en las agudizaciones de la EPOC mejoran la función pulmonar y la oxigenación, reducen el riesgo de sufrir una recidiva temprana y el fracaso terapéutico y acortan el tiempo de hospitalización<sup>126-128</sup>. Se recomienda administrar una tanda de cinco días de 40 mg al día<sup>129</sup>, de prednisona (o equivalente) ya que tratamientos más prolongados incrementan el riesgo de neumonía y mortalidad<sup>130</sup>. La prednisolona oral es igual de eficaz que su administración intravenosa<sup>131</sup>. Para algunos pacientes la budesónida nebulizada puede ser una alternativa adecuada a la corticoterapia sistémica<sup>127,132</sup>. Es posible que los glucocorticoides pueden ser menos eficaces para tratar las agudizaciones de la EPOC en pacientes con niveles sanguíneos de eosinófilos más bajos<sup>133</sup>.

### Antibióticos

Se recomienda el empleo de antibióticos en pacientes que expectoración purulenta, así como a la mayoría de los que necesiten ventilación mecánica (invasiva o no)<sup>134</sup>. Se recomienda que el tratamiento dure entre cinco y siete días<sup>135</sup> y el antibiótico se elegirá en función de las resistencias locales. A menudo se instaura primero tratamiento empírico con aminopenicilina asociada con ácido clavulánico, macrólido, tetraciclina o, en determinados pacientes, quinolona. Si el paciente sufre agudizaciones frecuentes, presenta una obstrucción del flujo aéreo grave o precisa ventilación mecánica se recomienda obtener cultivos del esputo u otro material procedente del pulmón, para determinar la presencia de bacterias gramnegativas (p. ej., *Pseudomonas*) o patógenos no sensibles a los antibióticos mencionados. La vía de administración (oral o intravenosa) dependerá de la capacidad del paciente de ingerir la medicación y de la farmacocinética del antibiótico.

### Tratamientos complementarios

Es necesario mantener el equilibrio hídrico, tratar las comorbilidades y vigilar el estado nutricional. Los pacientes con EPOC hospitalizados corren mayor riesgo de trombosis venosa profunda y embolia pulmonar, por lo que deben instaurarse medidas profilácticas<sup>136,137</sup>. En todo momento, el equipo asistencial debe insistir en la necesidad de dejar de fumar.

### Oxigenoterapia

La oxigenoterapia debe ajustarse para conseguir una saturación arterial de oxígeno de 88-92%<sup>138</sup>. La pulsioximetría es menos precisa que la gasometría arterial<sup>139</sup> y, en particular, puede sobrevalorar el contenido de oxígeno en personas de tez oscura<sup>140</sup>. En caso de agudización grave, se obtendrán gasometrías arteriales en función de la situación clínica, para vigilar la posible acidosis respiratoria por hipercapnia. Las mascarillas de tipo Venturi ofrecen una administración más precisa y controlada de oxígeno que las lentillas nasales<sup>1</sup>.

La oxigenoterapia nasal de alto flujo (OAF) permite administrar mezclas de aire y oxígeno calentadas y humidificadas mediante dispositivos especiales con flujos máximos de 8 l/min en lactantes y 60 l/min en adultos<sup>141</sup>. En pacientes EPOC con hipercapnia aguda (o crónica), la OAF se asocia a reducción de la frecuencia y el esfuerzo respiratorios, mejoría de la mecánica pulmonar y el intercambio de gases, prolongación del tiempo hasta la siguiente agudización e incremento de calidad de vida<sup>142-144</sup>, pero no evita la intubación de pacientes hospitalizados por agudización de EPOC<sup>145</sup>. Por ello, la European Respiratory Society (ERS) recomienda instituir soporte ventilatorio en vez de OAF en pacientes con agudización hipercápnica<sup>146</sup>.

### Soporte ventilatorio

El soporte ventilatorio puede proporcionarse por medios no invasivos, con mascarilla facial o nasal, o invasivos, mediante intubación traqueal o traqueostomía. La ventilación no invasiva mejora el intercambio de gases y reduce la frecuencia respiratoria, el trabajo respiratorio, la intensidad de la disnea, la necesidad de intubación traqueal y las complicaciones (p. ej., neumonías asociadas al respirador), así como la duración de la hospitalización y la mortalidad, por lo que en general debe ser considerada como primera opción terapéutica en los pacientes que precisen soporte ventilatorio<sup>147,148</sup>. Cuando el paciente mejora y es capaz de respirar cuatro horas por sí solo, se puede retirar la ventilación no invasiva sin necesidad de hacerlo gradualmente<sup>149</sup>.

Los pacientes que no mejoren con ventilación no invasiva deben recibir ventilación invasiva, aunque en esta decisión deben considerarse la reversibilidad del episodio, los deseos del paciente y la disponibilidad de unidades de cuidados intensivos<sup>150</sup>. Si es posible, se recomienda que el paciente otorgue un documento de voluntades anticipadas o un «testamento vital» que facilite estas decisiones. Los riesgos más importantes de la ventilación invasiva son la neumonía asociada al respirador, el baro y volu-trauma, y la ventilación prolongada que precise traqueostomía. Se desaconseja la administración de estimulantes respiratorios (como cafeína o doxapram) para tratar las agudizaciones de la EPOC<sup>1</sup>.

### **Alta y reingresos hospitalarios**

No existe un criterio objetivo (“mejoría y estabilidad clínica”) para dar de alta a un paciente después de una agudización que ha precisado hospitalización. Los reingresos precoces (<90 días) posteriores al alta son frecuentes y constituye un problema sanitario importante. Una revisión sistemática demuestra que las comorbilidades, los antecedentes de agudizaciones y hospitalización y la prolongación de la estancia hospitalaria son factores de riesgo significativos de reingreso al cabo de 30 días y 90 días después de una hospitalización por agudización de la EPOC<sup>151</sup>. Por eso conviene, antes de darle el alta, repasar con el paciente y su entorno cómo debe tomar la medicación, cómo ayudarlo en casa y qué controles tendrá que seguir<sup>152</sup>. También se aconseja programar el próximo control pronto (no más tarde de un mes), ya que se asocia con menos reingresos por sucesivas agudizaciones<sup>153</sup>. A continuación, se programará un control a los tres meses para verificar que se haya estabilizado la situación clínica del paciente y revisar los síntomas y la función pulmonar; además, siempre que sea posible, se evaluará el pronóstico de la enfermedad con sistemas de

puntuación multinivel como el índice BODE<sup>154</sup>. También se hará una gasometría arterial (o una determinación de la saturación arterial de oxígeno) para valorar con mayor precisión la necesidad de oxigenoterapia domiciliaria<sup>155</sup>. Los efectos de iniciar la rehabilitación pulmonar en las primeras cuatro semanas después del alta son controvertidos<sup>156,157</sup>.

### Pronóstico

El pronóstico a largo plazo tras hospitalización por agudización de la EPOC es malo, con una mortalidad a los cinco años de alrededor del 50%<sup>158</sup>. Los factores que se asocian a mal pronóstico de forma independiente son: edad avanzada, índice de masa corporal (IMC) bajo, comorbilidades (p. ej., patología cardiovascular y cáncer de pulmón), antecedentes de otras hospitalizaciones por agudización de EPOC, gravedad clínica de la agudización índice y necesidad de oxigenoterapia domiciliaria al alta<sup>159-161</sup>.

---

## Comorbilidades, multimorbilidad y fragilidad

---

Como se discute en detalle a continuación, la EPOC coexiste, casi invariablemente, con otras enfermedades crónicas que pueden afectar significativamente el estado clínico y pronóstico del paciente<sup>162</sup>. Estas comorbilidades pueden remedar las manifestaciones de la EPOC, con síntomas semejantes de disnea y opresión o dolor torácicos, de modo que es fácil errar el diagnóstico y perder oportunidades de tratamiento. A su vez, la EPOC puede afectar a la evolución de muchos de estas comorbilidades. Por ejemplo, la morbilidad es más alta entre los pacientes con insuficiencia cardíaca si además tienen EPOC. Algunas comorbilidades son independientes de la EPOC, mientras que otras guardan una relación etiológica, ya sea porque comparten factores de riesgo o porque una patología acrecienta la gravedad de la otra<sup>163</sup>. **En general, la presencia de comorbilidades no debe alterar el tratamiento de la EPOC, y éstas deben tratarse de acuerdo con sus respectivas guías clínicas independientemente de la EPOC.** Debe prestarse atención a tratar de minimizar, si es posible, la polifarmacia.

Las **enfermedades cardiovasculares** ocurren entre el 20% y el 70% de los pacientes con EPOC e incluyen hipertensión arterial, insuficiencia cardíaca, cardiopatía isquémica, arritmias y vasculopatía periférica<sup>164</sup>. La administración de fármacos bloqueantes selectivos de los receptores  $\beta_1$  pueden utilizarse en pacientes con EPOC si hay una indicación cardiovascular clara.

El **cáncer de pulmón** es frecuente en pacientes con EPOC<sup>165</sup>. Como en la población general, se recomienda realizar un TAC de baja radiación al año, a modo de cribado, por el hábito tabáquico<sup>78,79</sup>. En pacientes con EPOC no debida al tabaquismo, no hay suficientes datos que avalen el beneficio de este cribado.

Cerca del 30% de los enfermos de EPOC tienen **bronquiectasias**<sup>166</sup>. Las bronquiectasias asociadas a la EPOC se caracterizan por un incremento de la

expectoración, infecciones recurrentes y mayor frecuencia de agudizaciones. Se recomienda realizar un TAC torácico si se sospecha de bronquiectasia.

Alrededor del 14% de los enfermos de EPOC sufren **apnea del sueño**<sup>167</sup>. Esta situación empeora su pronóstico, ya que tienen más episodios de desaturación de oxígeno que pacientes con apneas obstructivas sin EPOC.

**Osteoporosis.** La osteoporosis en la EPOC suele pasar infradiagnosticada y se asocia con peor estado de salud y mal pronóstico<sup>168</sup>. El consumo recurrente de esteroides sistémicos aumenta el riesgo de osteoporosis, por lo que debe evitarse en la medida de lo posible.

**Diabetes y síndrome metabólico.** La prevalencia de diabetes es elevada en pacientes con EPOC y su pronóstico puede verse afectado por la enfermedad respiratoria<sup>164</sup>. La prevalencia del síndrome metabólico supera el 30% en pacientes EPOC<sup>169</sup>. Tanto la diabetes como el síndrome metabólico deben tratarse según las pautas habituales; tampoco debe dejar de tratarse la EPOC según su protocolo habitual.

**Reflujo gastroesofágico.** El reflujo gastroesofágico es un factor de riesgo de agudizaciones y se asocia con un peor estado de salud<sup>170,171</sup>. Un pequeño ensayo simple ciego sugiere que el tratamiento con inhibidores de la bomba de protones reduce el riesgo de agudización<sup>172</sup>, pero se precisan nuevos estudios para establecer cual es el tratamiento más eficaz para este trastorno en pacientes con EPOC<sup>173</sup>.

La **anemia** es frecuente en enfermos con EPOC<sup>174</sup>. Normalmente se trata de pacientes de edad más avanzada, con más comorbilidades cardio-metabólicas, disnea más acusada, peor calidad de vida, mayor obstrucción del flujo aéreo y menor capacidad de esfuerzo. Su riesgo de agudizaciones graves es más alto, al igual que la mortalidad.

La **policitemia secundaria** se asocia a hipertensión pulmonar<sup>175,176</sup>, trombosis venosa<sup>176</sup> y mortalidad. Aunque la prevalencia de la policitemia en la EPOC ha disminuido desde que se introdujo la oxigenoterapia domiciliaria crónica<sup>177</sup>, un estudio describe una prevalencia del 8,4% en enfermos EPOC tratados con oxigenoterapia<sup>178</sup>.

**Salud mental.** La ansiedad y la depresión son comorbilidades frecuentes, a menudo infradiagnosticadas en pacientes con EPOC<sup>179-182</sup>. Ambas se asocian a peor pronóstico<sup>181-183</sup>, edad más joven, sexo femenino, tabaquismo, mayor obstrucción al flujo aéreo, tos, pero calidad de vida y antecedentes de patología cardiovascular<sup>179,182,184</sup>. Por otra parte, el 32% de los enfermos de EPOC presentan algún tipo de deterioro cognitivo, si bien algunos estudios neuropsicológicos indican que el porcentaje real podría ascender al 56%<sup>185,186</sup>.

**Multimorbilidad y fragilidad.** Muchos pacientes con EPOC presentan multimorbilidad, es decir, dos o más enfermedades crónicas además de la EPOC. Estos enfermos presentan cuadros clínicos complejos, tanto en fase estable como durante los episodios de agudización. La multimorbilidad con frecuencia provoca fragilidad, caracterizada por la concurrencia de debilidad, fatiga, agotamiento, escasa actividad física y pérdida de peso no intencionada<sup>187</sup>.

---

## EPOC y COVID-19

---

Los enfermos con EPOC no corren mayor riesgo de contraer el SARS-CoV-2<sup>189,191</sup> pero si se infectan tienen mayor riesgo de hospitalización, ingreso en UCI y mortalidad<sup>191</sup>. Es preciso hacer test del SARS-CoV-2 a todos los pacientes de EPOC que presenten síntomas respiratorios o de otra índole compatibles con la COVID-19, aunque sean leves. Los pacientes EPOC deben observar las medidas básicas de prevención e higiene para evitar el contagio del SARS-CoV-2, como mantener la distancia física, uso de mascarilla y lavado de manos<sup>188</sup>. Deben vacunarse contra la COVID-19 según lo estipulado en los calendarios nacionales. No deben abandonar el tratamiento farmacológico de su EPOC<sup>189</sup>.

Se ha observado una notable reducción de las agudizaciones de la EPOC y las hospitalizaciones durante la pandemia<sup>190</sup>, posiblemente debida las medidas preventivas impuestas. Sin embargo, el distanciamiento físico y el confinamiento no deben entrañar aislamiento social e inactividad. Los pacientes deben permanecer en contacto con sus amistades y familiares, mediante telecomunicación, y deben mantenerse activos. También deben evitar quedarse sin medicación de reserva.

---

## Nuevas oportunidades

---

La EPOC es una enfermedad frecuente, prevenible y tratable, pero ni se diagnostican todos los casos ni siempre se diagnostica bien, por lo que muchos pacientes no reciben el tratamiento que necesitan o siguen tratamientos incorrectos<sup>1</sup>. La constatación de que hay factores ambientales distintos del tabaco que pueden contribuir a la EPOC, de que puede debutar en las primeras etapas de la vida, afectando también a personas jóvenes, y de que hay trastornos precursores («pre-EPOC» y «PRISm») abre nuevas ventanas de oportunidad para prevenirla, diagnosticarla antes e instituir las medidas terapéuticas adecuadas y oportunas<sup>72</sup>. Cabe destacar que varios tratamientos farmacológicos y no farmacológicos reducen la mortalidad de los pacientes con EPOC (figura 6), pero para instaurarlos es necesario, primero, diagnosticar la enfermedad. Por ello, cualquier iniciativa concebida para corregir el infra-diagnóstico de la EPOC es fundamental, particularmente en el entorno de la atención primaria.

---

## Agradecimientos

---

Los autores agradecen a Katie Langefeld y Ruth Hadfield por su trabajo en la edición del informe GOLD 2023, así como a los miembros de la Academia GOLD Emeriti, la Asamblea GOLD y otras entidades del sector privado, que han formulado valiosos comentarios y sugerencias. Finalmente, los autores quieren agradecer a Elsevier la traducción castellana del documento original en inglés (revisada por el Dr. A. Agusti).

---

## Referencias

---

1. Global Initiative for Chronic Obstructive Lung Disease (GOLD); 2023. Available from: <https://goldcopd.org/2023-gold-report-2/>
2. Celli B, Fabbri L, Criner G, Martinez FJ, Mannino D, Vogelmeier C, et al. Definition and nomenclature of chronic obstructive pulmonary disease: time for its revision. *Am J Respir Crit Care Med*. 2022;206:1317–25.
3. Global Initiative for Chronic Obstructive Lung Disease; 2022. Available from: [www.goldcopd.org](http://www.goldcopd.org)
4. Agustí A, Melén E, DeMeo DL, Breyer-Kohansal R, Faner R. Pathogenesis of chronic obstructive pulmonary disease: understanding the contributions of gene–environment interactions across the lifespan. *Lancet Respir Med*. 2022;10:512–24.
5. Kohansal R, Martinez-Camblor P, Agustí A, Buist AS, Mannino DM, Soriano JB. The natural history of chronic airflow obstruction revisited: an analysis of the Framingham offspring cohort. *Am J Respir Crit Care Med*. 2009;180:3–10.
6. Rennard SI, Vestbo J. COPD: the dangerous underestimate of 15%. *Lancet*. 2006;367:1216–9.
7. Raad D, Gaddam S, Schunemann HJ, Irani J, Abou Jaoude P, Honeine R, et al. Effects of water-pipe smoking on lung function: a systematic review and meta-analysis. *Chest*. 2011;139:764–74.
8. Günen H, Tarraf H, Nemati A, Al Ghobain M, Al Mutairi S, Aoun Bacha Z. Water-pipe tobacco smoking. *Tuberkuloz ve toraks*. 2016;64:94–6.
9. She J, Yang P, Wang Y, Qin X, Fan J, Wang Y, et al. Chinese water-pipe smoking and the risk of COPD. *Chest*. 2014;146:924–31.
10. Tan WC, Lo C, Jong A, Xing L, Fitzgerald MJ, Vollmer WM, et al. Mari-juana and chronic obstructive lung disease: a population-based study. *CMAJ*. 2009;180:814–20.
11. Yin P, Jiang CQ, Cheng KK, Lam TH, Lam KH, Miller MR, et al. Passive smoking exposure and risk of COPD among adults in China: the Guangzhou Biobank Cohort Study. *Lancet*. 2007;370:751–7.
12. Tager IB, Ngo L, Hanrahan JP. Maternal smoking during pregnancy. Effects on lung function during the first 18 months of life. *Am J Respir Crit Care Med*. 1995;152:977–83.
13. Yang IA, Jenkins CR, Salvi SS. Chronic obstructive pulmonary disease in never-smokers: risk factors, pathogenesis, and implications for prevention and treatment. *Lancet Respir Med*. 2022;10:497–511.
14. Orozco-Levi M, Garcia-Aymerich J, Villar J, Ramírez-Sarmiento A, Antó JM, Gea J. Wood smoke exposure and risk of chronic obstructive pulmonary disease. *Eur Respir J*. 2006;27:542–6.

15. Mortimer K, Montes de Oca M, Salvi S, Balakrishnan K, Hadfield RM, Ramirez-Venegas A, et al. Household air pollution and COPD: cause and effect or confounding by other aspects of poverty? *Int J Tuberc Lung Dis.* 2022;26:206–16.
16. Sana A, Somda SMA, Meda N, Bouland C. Chronic obstructive pulmonary disease associated with biomass fuel use in women: a systematic review and meta-analysis. *BMJ Open Respir Res.* 2018;5:e000246.
17. Ramírez-Venegas A, Montiel-Lopez F, Falfan-Valencia R, Pérez-Rubio G, Sansores RH. The “slow horse racing effect” on lung function in adult life in chronic obstructive pulmonary disease associated to biomass exposure. *Front Med(Lausanne).* 2021;8:700836.
18. Paulin LM, Diette GB, Blanc PD, Putcha N, Eisner MD, Kanner RE, et al. Occupational exposures are associated with worse morbidity in patients with chronic obstructive pulmonary disease. *Am J Respir Crit Care Med.* 2015;191:557–65.
19. De Matteis S, Jarvis D, Darnton A, Hutchings S, Sadhra S, Fishwick D, et al. The occupations at increased risk of COPD: analysis of lifetime job-histories in the population-based UK Biobank Cohort. *Eur Respir J.* 2019;54:1900186.
20. Hnizdo E, Sullivan PA, Bang KM, Wagner G. Association between chronic obstructive pulmonary disease and employment by industry and occupation in the US population: a study of data from the Third National Health and Nutrition Examination Survey. *Am J Epidemiol.* 2002;156:738–46.
21. Guo C, Zhang Z, Lau AKH, Lin CQ, Chuang YC, Chan J, et al. Effect of long-term exposure to fine particulate matter on lung function decline and risk of chronic obstructive pulmonary disease in Taiwan: a longitudinal, cohort study. *Lancet Planet Health.* 2018;2:e114–25.
22. Bourbeau J, Doiron D, Biswas S, Smith BM, Benedetti A, Brook JR, et al. Ambient air pollution and dysanapsis: associations with lung function and chronic obstructive pulmonary disease in the Canadian Cohort Obstructive Lung Dis-ease Study. *Am J Respir Crit Care Med.* 2022;206:44–55.
23. Li J, Sun S, Tang R, Qiu H, Huang Q, Mason TG, et al. Major air pollutants and risk of COPD exacerbations: a systematic review and meta-analysis. *Int J Chron Obstruct Pulmon Dis.* 2016;11:3079–91.
24. Stoller JK, Aboussouan LS.  $\alpha_1$ -Antitrypsin deficiency. *The Lancet.* 2005;365:2225–36.
25. Blanco I, Diego I, Bueno P, Pérez-Holanda S, Casas-Maldonado F, Miravittles M. Prevalence of  $\alpha_1$ (1)-antitrypsin PiZZ genotypes in patients with COPD in Europe: a systematic review. *Eur Respir Rev.* 2020;29: 200014.
26. Stockley RA. Alpha-1 antitrypsin deficiency: the learning goes on. *Am J Respir Crit Care Med.* 2020;202:6–7.



27. Cho MH, Hobbs BD, Silverman EK. Genetics of chronic obstructive pulmonary disease: understanding the pathobiology and heterogeneity of a complex disorder. *Lancet Respir Med*. 2022;10:485-96.
28. Agustí A, Faner R. Lung function trajectories in health and disease. *Lancet Respir Med*. 2019;7:358–64.
29. Agustí A, Noell G, Brugada J, Faner R. Lung function in early adulthood and health in later life: a transgenerational cohort analysis. *Lancet Respir Med*. 2017;5:935–45.
30. Çolak Y, Nordestgaard BG, Vestbo J, Lange P, Afzal S. Relationship between supernormal lung function and long-term risk of hospitalisations and mortality: a population-based cohort study. *Eur Respir J*. 2021:2004055.
31. Çolak Y, Nordestgaard BG, Lange P, Vestbo J, Afzal S. Supernormal lung function and risk of COPD: a contemporary population-based cohort study. *EClinical Medicine*. 2021;37:100974.
32. Lawlor DA, Ebrahim S, Davey Smith G. Association of birth weight with adult lung function: findings from the British Women's Heart and Health Study and a meta-analysis. *Thorax*. 2005;60:851–8.
33. Green M, Mead J, Turner JM. Variability of maximum expiratory flow–volume curves. *J Appl Physiol*. 1974;37:67–74.
34. Ito K, Barnes PJ. COPD as a disease of accelerated lung aging. *Chest*. 2009;135:173–80.
35. Martin TR, Feldman HA, Fredberg JJ, Castile RG, Mead J, Wohl ME. Relationship between maximal expiratory flows and lung volumes in growing humans. *J Appl Physiol* (1985). 1988;65:822–8.
36. Rawlins EL, Okubo T, Xue Y, Brass DM, Auten RL, Hasegawa H, et al. The role of Scgb1a1 + Clara cells in the long-term maintenance and repair of lung airway, but not alveolar, epithelium. *Cell Stem Cell*. 2009;4:525–34.
37. Smith BM, Kirby M, Hoffman EA, Kronmal RA, Aaron SD, Allen NB, et al. Association of dysanapsis with chronic obstructive pulmonary disease among older adults. *JAMA*. 2020;323:2268–80.
38. Dharmage SC, Bui DS, Walters EH, Lowe AJ, Thompson B, Bowatte G, et al. Lifetime spirometry patterns of obstruction and restriction, and their risk factors and outcomes: a prospective cohort study. *Lancet Respir Med*. 2022;11:273-82.
39. Bose S, Pascoe C, McEvoy C. Lifetime lung function trajectories and COPD: when the train derails. *Lancet Respir Med*. 2022.
40. Stern DA, Morgan WJ, Wright AL, Guerra S, Martinez FD. Poor airway function in early infancy and lung function by age 22 years: a non-selective longitudinal cohort study. *Lancet*. 2007;370:758–64.

41. Regan EA, Lynch DA, Curran-Everett D, Curtis JL, Austin JH, Grenier PA, et al. Clinical and radiologic disease in smokers with normal spirometry. *JAMA Intern Med.* 2015;175:1539–49.
42. Lange P, Celli B, Agusti A, Boje Jensen G, Divo M, Faner R, et al. Lung-function trajectories leading to chronic obstructive pulmonary disease. *N Engl J Med.* 2015;373:111–22.
43. Landis SH, Muellerova H, Mannino DM, Menezes AM, Han MK, van der Molen T, et al. Continuing to Confront COPD International Patient Survey: methods COPD prevalence, and disease burden in 2012–2013. *Int J Chron Obstruct Pulmon Dis.* 2014;9:597–611.
44. DeMeo DL, Ramagopalan S, Kavati A, Vegesna A, Han MK, Yadao A, et al. Women manifest more severe COPD symptoms across the life course. *Int J Chron Obstruct Pulmon Dis.* 2018;13:3021–9.
45. Townend J, Minelli C, Mortimer K, Obaseki DO, Al Ghobain M, Cherkaski H, et al. The association between chronic airflow obstruction and poverty in 12 sites of the multinational BOLD study. *Eur Respir J.* 2017;49: 1601880.
46. Gershon AS, Warner L, Cascagnette P, Victor JC, To T. Lifetime risk of developing chronic obstructive pulmonary disease: a longitudinal population study. *Lancet.* 2011;378:991–6.
47. de Marco R, Accordini S, Marcon A, Cerveri I, Antó JM, Gislason T, et al. Risk factors for chronic obstructive pulmonary disease in a European cohort of young adults. *Am J Respir Crit Care Med.* 2011;183:891–7.
48. McGeachie MJ, Yates KP, Zhou X, Guo F, Sternberg AL, Van Natta ML, et al. Patterns of growth and decline in lung function in persistent childhood asthma. *N Engl J Med.* 2016;374:1842–52.
49. Allinson JP, Hardy R, Donaldson GC, Shaheen SO, Kuh D, Wedzicha JA. Combined impact of smoking and early life exposures on adult lung function trajectories. *Am J Respir Crit Care Med.* 2017;196:1021–30.
50. Martínez-García M, Faner R, Oscullo G, la Rosa-Carrillo D, Soler-Cataluña JJ, Ballester M, et al. Chronic bronchial infection is associated with more rapid lung function decline in chronic obstructive pulmonary disease. *Ann Am Thorac Soc.* 2022;19:1842–7.
51. Fan H, Wu F, Liu J, Zeng W, Zheng S, Tian H, et al. Pulmonary tuberculosis as a risk factor for chronic obstructive pulmonary disease: a systematic review and meta-analysis. *Ann Transl Med.* 2021;9:390.
52. Bigna JJ, Kenne AM, Asangbeh SL, Sibetcheu AT. Prevalence of chronic obstructive pulmonary disease in the global population with HIV: a systematic review and meta-analysis. *Lancet Glob Health.* 2018;6:e193–202.
53. Aaron SD, Tan WC, Bourbeau J, Sin DD, Loves RH, MacNeil J, et al. Diagnostic instability and reversals of chronic obstructive pulmonary disease diagnosis in

individuals with mild to moderate airflow obstruction. *Am J Respir Crit Care Med*. 2017;196:306–14.

54. Schermer TR, Robberts B, Crockett AJ, Thoonen BP, Lucas A, Grootens J, et al. Should the diagnosis of COPD be based on a single spirometry test? *NPJ Prim Care Respir Med*. 2016;26:16059.

55. van Dijk W, Tan W, Li P, Guo B, Li S, Benedetti A, et al. Clinical relevance of fixed ratio vs lower limit of normal of FEV1/FVC in COPD: patient-reported outcomes from the CanCOLD cohort. *Ann Fam Med*. 2015;13:41–8.

56. Guder G, Brenner S, Angermann CE, Ertl G, Held M, Sachs AP, et al. GOLD or lower limit of normal definition? A comparison with expert-based diagnosis of chronic obstructive pulmonary disease in a prospective cohort-study. *RespirRes*. 2012;13:13.

57. Bhatt SP, Balte PP, Schwartz JE, Cassano PA, Couper D, Jacobs DR Jr, et al. Discriminative accuracy of FEV1:FVC thresholds for COPD-related hospitalization and mortality. *JAMA*. 2019;321:2438–47.

58. Albert P, Agusti A, Edwards L, Tal-Singer R, Yates J, Bakke P, et al. Bronchodilator responsiveness as a phenotypic characteristic of established chronic obstructive pulmonary disease. *Thorax*. 2012;67:701–8.

59. Hansen JE, Porszasz J. Counterpoint: is an increase in FEV(1) and/or FVC  $\geq 12\%$  of control and  $\geq 200$  mL the best way to assess positive bronchodilator response? No. *Chest*. 2014;146:538–41.

60. Agusti A, Hogg JC. Update on the pathogenesis of chronic obstructive pulmonary disease. *N Engl J Med*. 2019;381:1248–56.

61. Zhou Y, Zhong NS, Li X, Chen S, Zheng J, Zhao D, et al. Tiotropium in early-stage chronic obstructive pulmonary disease. *N Engl J Med*. 2017;377:923–35.

62. Morla M, Busquets X, Pons J, Sauleda J, MacNee W, Agusti AG. Telomere shortening in smokers with and without COPD. *Eur Respir J*. 2006;27:525–8

63. Martinez FJ, Han MK, Allinson JP, Barr RG, Boucher RC, Calverley PMA, et al. At the root: defining and halting progression of early chronic obstructive pulmonary disease. *Am J Respir Crit Care Med*. 2018;197:1540–51.

64. Colak Y, Afzal S, Nordestgaard BG, Lange P, Vestbo J. Importance of early COPD in young adults for development of clinical COPD: findings from the Copenhagen General Population Study. *Am J Respir Crit Care Med*. 2020;203:1245–56.

65. Cosío BG, Pascual-Guardia S, Borrás-Santos A, Peces-Barba G, Santos S, Vigil L, et al. Phenotypic characterisation of early COPD: a prospective case–control study. *ERJ Open Res*. 2020;6:00047–2020.

66. Sanchez-Salcedo P, Divo M, Casanova C, Pinto-Plata V, de-Torres JP, Cote C, et al. Disease progression in young patients with COPD: rethinking the Fletcher and Peto model. *Eur Respir J*. 2014;44:324–31.

67. Han MK, Agusti A, Celli BR, Criner GJ, Halpin DMG, Roche N, et al. From GOLD0 to pre-COPD. *Am J Respir Crit Care Med*. 2021;203:414–23.
68. Han MK, Ye W, Wang D, White E, Arjomandi M, Barjaktarevic IZ, et al. Bronchodilators in tobacco-exposed persons with symptoms and preserved lung function. *N Engl J Med*. 2022;387:1173–84.
69. Martinez FA, Celli A, Han BR, Allinson MK, Bhatt JSP. Treatment trials in pre-Q10COPD and young COPD: time to move forward. *Am J Respir Crit Care Med*. 2021[in press].
70. Wan ES, Castaldi PJ, Cho MH, Hokanson JE, Regan EA, Make BJ, et al. Epidemiology, genetics, and subtyping of preserved ratio impaired spirometry (PRISm) in COPD Gene. *Respir Res*. 2014;15:89.
71. Wan ES. The clinical spectrum of PRISm. *Am J Respir Crit Care Med*. 2022;206:524–5.
72. Stolz D, Mkorombindo T, Schumann DM, Agusti A, Ash SY, Bafadhel M, et al. Towards the elimination of chronic obstructive pulmonary disease: a Lancet Commission. *Lancet*. 2022;400:921–72.
73. Divo M, Cote C, de Torres JP, Casanova C, Marin JM, Pinto-Plata V, et al. Comorbidities and risk of mortality in patients with chronic obstructive pulmonary disease. *Am J Respir Crit Care Med*. 2012;186:155–61.
74. Rodriguez-Roisin R, Rabe K, Vestbo J, Vogelmeier C, Agusti A. GOLD 20th anniversary: a brief history of time. *Eur Respir J*. 2017;50:1700671.
75. Scioscia G, Blanco I, Arismendi E, Burgos F, Gistau C, Foschino Barbaro MP, et al. Different dyspnoea perception in COPD patients with frequent and infrequent exacerbations. *Thorax*. 2017;72:117–21.
76. Haruna A, Muro S, Nakano Y, Ohara T, Hoshino Y, Ogawa E, et al. CT scan findings of emphysema predict mortality in COPD. *Chest*. 2010;138:635–40.
77. Martinez-Garcia MA, de la Rosa-Carrillo D, Soler-Cataluna JJ, Catalan-Serra P, Ballester M, Roca Vanaclocha Y, et al. Bronchial infection and temporal evolution of bronchiectasis in patients with chronic obstructive pulmonary disease. *Clin Infect Dis*. 2021;72:403–10.
78. The National Lung Screening Trial Research Team. Reduced lung-cancer mortality with low-dose computed tomographic screening. *N Engl J Med*. 2011;365:395–409.
79. de Koning HJ, van der Aalst CM, de Jong PA, Scholten ET, Nackaerts K, Heuvelmans MA, et al. Reduced lung-cancer mortality with volume CT screening in a randomized trial. *N Engl J Med*. 2020. 382;503-13.
80. Galban CJ, Han MK, Boes JL, Chughtai KA, Meyer CR, Johnson TD, et al. Computed tomography-based biomarker provides unique signature for diagnosis of COPD phenotypes and disease progression. *Nat Med*. 2012;18:1711–5.

81. Vasilescu DM, Martinez FJ, Marchetti N, Galban CJ, Hatt C, Meldrum CA, et al. Noninvasive imaging biomarker identifies small airway damage in severe chronic obstructive pulmonary disease. *Am J Respir Crit Care Med*. 2019;200:575–81.
82. Bhatt SP, Soler X, Wang X, Murray S, Anzueto AR, Beaty TH, et al. Association between functional small airway disease and FEV1 decline in chronic obstructive pulmonary disease. *Am J Respir Crit Care Med*. 2016;194:178–84.
83. Ezponda A, Casanova C, Divo M, Marin-Oto M, Cabrera C, Marin JM, et al. Chest CT-assessed comorbidities and all-cause mortality risk in COPD patients in the BODE cohort. *Respirology*. 2022;27:286–93.
84. Halpin DMG, Mahler DA. A systematic review of published algorithms for selecting an inhaled delivery system in chronic obstructive pulmonary disease. *Ann Am Thorac Soc*. 2022;19:1213–20.
85. Mahler DA, Decramer M, D'Urzo A, Worth H, White T, Alagappan VK, et al. Dual bronchodilation with QVA149 reduces patient-reported dyspnoea in COPD: the BLAZE study. *Eur Respir J*. 2014;43:1599–609.
86. Singh D, Ferguson GT, Bolitschek J, Grönke L, Hallmann C, Bennett N, et al. Tiotropium + olodaterol shows clinically meaningful improvements in quality of life. *Respir Med*. 2015;109:1312–9.
87. Maltais F, Bjermer L, Kerwin EM, Jones PW, Watkins ML, Tombs L, et al. Efficacy of umeclidinium/vilanterol versus umeclidinium and salmeterol monotherapies in symptomatic patients with COPD not receiving inhaled corticosteroids: the EMAX randomised trial. *Respir Res*. 2019;20:238.
88. Lipson DA, Barnhart F, Brealey N, Brooks J, Criner GJ, Day NC, et al. Once-daily single-inhaler triple versus dual therapy in patients with COPD. *N Engl J Med*. 2018;378:1671–80.
89. Rabe KF, Martinez FJ, Ferguson GT, Wang C, Singh D, Wedzicha JA, et al. Triple inhaled therapy at two glucocorticoid doses in moderate-to-very-severe COPD. *N Engl J Med*. 2020;383:35–48.
90. Reddel HK, Bacharier LB, Bateman ED, Brightling CE, Brusselle GG, Buhl R, et al. Global Initiative for Asthma Strategy 2021: executive summary and rationale for key changes. *Am J Respir Crit Care Med*. 2022;205:17–35.
91. Agusti A, Bel E, Thomas M, Vogelmeier C, Brusselle G, Holgate ST, et al. Treatable traits: toward precision medicine of airway diseases. *Eur Respir J*. 2016;47:410–9.
92. Agusti A, Rapsomaniki E, Beasley R, Hughes R, Mullerova H, Papi A, et al. Treatable traits in the NOVELTY study. *Respirology*. 2022;27:929–40.
93. Martinez FJ, Calverley PM, Goehring UM, Brose M, Fabbri LM, Rabe KF. Effect of roflumilast on exacerbations in patients with severe chronic obstructive pulmonary disease uncontrolled by combination therapy (REACT): a multicentre randomised controlled trial. *Lancet*. 2015;385:857–66.

94. Martinez FJ, Rabe KF, Sethi S, Pizzichini E, McIvor A, Anzueto A, et al. Effect of roflumilast and inhaled corticosteroid/long-acting  $\beta_2$ -agonist on chronic obstructive pulmonary disease exacerbations (RE2SPOND). A randomized clinical trial. *Am J Respir Crit Care Med*. 2016;194:559–67.
95. Rabe KF, Calverley PMA, Martinez FJ, Fabbri LM. Effect of roflumilast in patients with severe COPD and a history of hospitalisation. *Eur Respir J*. 2017;50: 1700158.
96. Albert RK, Connett J, Bailey WC, Casaburi R, Cooper JA, Criner GJ, et al. Azithromycin for prevention of exacerbations of COPD. *N Engl J Med*. 2011;365:689–98.
97. Han MK, Tayob N, Murray S, Dransfield MT, Washko G, Scanlon PD, et al. Predictors of COPD exacerbation reduction in response to daily azithromycin therapy. *Am J Respir Crit Care Med*. 2014;189:1503–8.
98. Magnussen H, Disse B, Rodriguez-Roisin R, Kirsten A, Watz H, Tetzlaff K, et al. Withdrawal of inhaled glucocorticoids and exacerbations of COPD. *N Engl J Med*. 2014;371:1285–94.
99. Siddiqui SH, Guasconi A, Vestbo J, Jones P, Agusti A, Paggiaro P, et al. Blood eosinophils: a biomarker of response to extrafine beclomethasone/formoterolin chronic obstructive pulmonary disease. *Am J Respir Crit Care Med*. 2015;192:523–5.
100. Pascoe S, Locantore N, Dransfield MT, Barnes NC, Pavord ID. Blood eosinophil counts, exacerbations, and response to the addition of inhaled fluticasone furoate to vilanterol in patients with chronic obstructive pulmonary disease: a secondary analysis of data from two parallel randomised controlled trials. *Lancet Respir Med*. 2015. 3;435–52.
101. Papi A, Vestbo J, Fabbri L, Corradi M, Prunier H, Cohuet G, et al. Extrafine inhaled triple therapy versus dual bronchodilator therapy in chronic obstructive pulmonary disease (TRIBUTE): a double-blind, parallel group, randomised controlled trial. *The Lancet*. 2017;391:1076–84.
102. Vestbo J, Papi A, Corradi M, Blazhko V, Montagna I, Francisco C, et al. Single inhaler extrafine triple therapy versus long-acting muscarinic antagonist therapy for chronic obstructive pulmonary disease (TRINITY): a double-blind, parallel group, randomised controlled trial. *Lancet*. 2017;389:1919–29.
103. Agusti A, Fabbri LM, Singh D, Vestbo J, Celli B, Franssen FM, et al. Inhaled corticosteroids in COPD: friend or foe? *Eur Respir J*. 2018;52:1801219.
104. Singh D, Agusti A, Martinez FJ, Papi A, Pavord ID, Wedzicha JA, et al. Blood eosinophils and chronic obstructive pulmonary disease: a Global Initiative for Chronic Obstructive Lung Disease Science Committee 2022 Review. *Am J Respir Crit Care Med*. 2022;206:17–24.
105. Landis SH, Suruki R, Hilton E, Compton C, Galwey NW. Stability of blood eosinophil count in patients with COPD in the UK Clinical Practice Research Datalink. *COPD*. 2017;14:382–8.

106. Oshagbemi MOA, Burden DAM, Braeken MDCW, Henskens DY, Wouters PEFM, Driessen MJHM, et al. Stability of blood eosinophils in COPD and controls and the impact of gender, age, smoking and baseline counts. *Am J Respir Crit Care Med*. 2017;195:1402–4.
107. Stolbrink M, Thomson H, Hadfield RM, Ozoh OB, Nantanda R, Jayasooriya S, et al. The availability, cost, and affordability of essential medicines for asthma and COPD in low-income and middle-income countries: a systematic review. *Lancet Glob Health*. 2022;10:e1423–42.
108. Montes de Oca M. Smoking cessation/vaccinations. *Clin Chest Med*. 2020;41:495–512.
109. Pitta F, Troosters T, Spruit MA, Probst VS, Decramer M, Gosselink R. Characteristics of physical activities in daily life in chronic obstructive pulmonary disease. *Am J Respir Crit Care Med*. 2005;171:972–7.
110. Mantoani LC, Rubio N, McKinstry B, MacNee W, Rabinovich RA. Interventions to modify physical activity in patients with COPD: a systematic review. *Eur Respir J*. 2016;48:69–81.
111. Watz H, Pitta F, Rochester CL, Garcia-Aymerich J, Zuwallack R, Troosters T, et al. An official European Respiratory Society statement on physical activity in COPD. *Eur Respir J*. 2014;44:1521–37.
112. Spielmanns M, Gloeckl R, Jarosch I, Leitl D, Schneeberger T, Boeselt T, et al. Using a smartphone application maintains physical activity following pulmonary rehabilitation in patients with COPD: a randomised controlled trial. *Thorax*. 2022. <https://doi.org/10.1136/thoraxjnl-2021-218338>
113. Spruit MA, Singh SJ, Garvey C, Zuwallack R, Nici L, Rochester C, et al. An Official American Thoracic Society/European Respiratory Society Statement: key concepts and advances in pulmonary rehabilitation. *Am J Respir Crit Care Med*. 2013;188:e13–64.
114. Vogiatzis I, Rochester CL, Spruit MA, Troosters T, Cline EM. Increasing implementation and delivery of pulmonary rehabilitation: key messages from the new ATS/ERS policy statement. *Eur Respir J*. 2016;47:1336–41.
115. Garvey C, Bayles MP, Hamm LF, Hill K, Holland A, Limberg TM, et al. Pulmonary rehabilitation exercise prescription in chronic obstructive pulmonary disease: review of selected guidelines: an official statement from the American Association of Cardiovascular and Pulmonary Rehabilitation. *J Cardiopulm Rehabil Prev*. 2016;36:75–83.
116. Stone PW, Hickman K, Steiner MC, Roberts CM, Quint JK, Singh SJ. Predictors of referral to pulmonary rehabilitation from UK primary care. *Int J Chron Obstruct Pulmon Dis*. 2020;15:2941–52.
117. Cox NS, Dal Corso S, Hansen H, McDonald CF, Hill CJ, Zanaboni P, et al. Telerehabilitation for chronic respiratory disease. *Cochrane Database Syst Rev*. 2021;1:Cd013040.

118. Houchen-Wolloff L, Steiner MC. Pulmonary rehabilitation at a time of social distancing: prime time for tele-rehabilitation? *Thorax*. 2020;75:446–7.
119. Holland AE, Malaguti C, Hoffman M, Lahham A, Burge AT, Dowman L, et al. Home-based or remote exercise testing in chronic respiratory disease, during the COVID-19 pandemic and beyond: a rapid review. *Chron Respir Dis*. 2020;17,1479973120952418.
120. Celli BR, Fabbri LM, Aaron SD, Agusti A, Brook R, Criner GJ, et al. An updated definition and severity classification of COPD exacerbations: the Rome proposal. *Am J Respir Crit Care Med*. 2021;204:1251–8.
121. Beghe B, Verduri A, Roca M, Fabbri LM. Exacerbation of respiratory symptoms in COPD patients may not be exacerbations of COPD. *Eur Respir J*. 2013;41:993–5.
122. Soler-Cataluña J, Miravittles M, Fernandez-Villar A, Izquierdo J, Garcia-Rivero J, Lopez-Campos J, et al. Exacerbations in COPD: a personalized approach to care. *Lancet Respir Med*. 2023;11:224-6.
123. Bardsley G, Pilcher J, McKinsty S, Shirtcliffe P, Berry J, Fingleton J, et al. Oxygen versus air-driven nebulisers for exacerbations of chronic obstructive pulmonary disease: a randomised controlled trial. *BMC Pulm Med*. 2018;18:157.
124. Barr RG, Rowe BH, Camargo CA Jr. Methylxanthines for exacerbations of chronic obstructive pulmonary disease: meta-analysis of randomised trials. *BMJ*. 2003;327:643.
125. Duffy N, Walker P, Diamantea F, Calverley PM, Davies L. Intravenous aminophylline in patients admitted to hospital with non-acidotic exacerbations of chronic obstructive pulmonary disease: a prospective randomised controlled trial. *Thorax*. 2005;60:713–7.
126. Davies L, Angus RM, Calverley PM. Oral corticosteroids in patients admitted to hospital with exacerbations of chronic obstructive pulmonary disease: a prospective randomised controlled trial. *Lancet*. 1999;354:456–60.
127. Maltais F, Ostinelli J, Bourbeau J, Tonnel AB, Jacquemet N, Haddon J, et al. Comparison of nebulized budesonide and oral prednisolone with placebo in the treatment of acute exacerbations of chronic obstructive pulmonary disease: a randomized controlled trial. *Am J Respir Crit Care Med*. 2002;165:698–703.
128. Aaron SD, Vandemheen KL, Hebert P, Dales R, Stiell IG, Ahuja J, et al. Outpatient oral prednisone after emergency treatment of chronic obstructive pulmonary disease. *N Engl J Med*. 2003;348:2618.
129. Leuppi JD, Schuetz P, Bingisser R. Short-term vs conventional glucocorticoid therapy in acute exacerbations of chronic obstructive pulmonary disease: the reduce randomized clinical trial. *JAMA*. 2013;309:2223–31.
130. Sivapalan P, Ingebrigtsen TS, Rasmussen DB, Sorensen R, Rasmussen CM, Jensen CB, et al. COPD exacerbations: the impact of long versus short courses of oral corticosteroids on mortality and pneumonia: nationwide data on 67 000 patients with COPD followed for 12 months. *BMJ Open Respir Res*. 2019;6:e000407.



131. de Jong YP, Uil SM, Grotjohan HP, Postma DS, Kerstjens HA, van den Berg JW. Oral or IV prednisolone in the treatment of COPD exacerbations: a randomized, controlled, double-blind study. *Chest*. 2007;132:1741–7.
132. Gunen H, Hacievliyagil SS, Yetkin O, Gulbas G, Mutlu LC, In E. The role of nebulised budesonide in the treatment of exacerbations of COPD. *Eur Respir J*. 2007;29:660–7.
133. Bafadhel M, McKenna S, Terry S, Mistry V, Pancholi M, Venge P, et al. Blood eosinophils to direct corticosteroid treatment of exacerbations of chronic obstructive pulmonary disease. *Am J Respir Crit Care Med*. 2012;186:48–55.
134. Anthonisen NR, Manfreda J, Warren CP, Hershfield ES, Harding GK, Nelson NA. Antibiotic therapy in exacerbations of chronic obstructive pulmonary disease. *Ann Intern Med*. 1987;106:196–204.
135. Llor C, Moragas A, Miravittles M, Mesquita P, Cordoba G. Are short courses of antibiotic therapy as effective as standard courses for COPD exacerbations? A systematic review and meta-analysis. *Pulm Pharmacol Ther*. 2022;72:102111.
136. Couturaud F, Bertoletti L, Pastre J, Roy PM, Le Mao R, Gagnadoux F, et al. Prevalence of pulmonary embolism among patients with COPD hospitalized with acutely worsening respiratory symptoms. *JAMA*. 2021;325:59–68.
137. Jimenez D, Agusti A, Tabernero E, Jara-Palomares L, Hernando A, Ruiz-Artacho P, et al. Effect of a pulmonary embolism diagnostic strategy on clinical outcomes in patients hospitalized for COPD exacerbation: a randomized clinical trial. *JAMA*. 2021;326:1277–85.
138. Austin MA, Wills KE, Blizzard L, Walters EH, Wood-Baker R. Effect of high flow oxygen on mortality in chronic obstructive pulmonary disease patients in prehospital setting: randomised controlled trial. *BMJ*. 2010;341:c5462.
139. Lacasse Y, Thériault S, St-Pierre B, Bernard S, Sériès F, Bernatchez HJ, et al. Oximetry neither to prescribe long-term oxygen therapy nor to screen for severe hypoxaemia. *ERJ Open Res*. 2021;7:00272–2021.
140. Sjoding MW, Dickson RP, Iwashyna TJ, Gay SE, Valley TS. Racial bias in pulse oximetry measurement. *N Engl J Med*. 2020;383:2477–8.
141. Roca O, Hernández G, Díaz-Lobato S, Carratalá JM, Gutiérrez RM, Masclans JR. Current evidence for the effectiveness of heated and humidified high flow nasal cannula supportive therapy in adult patients with respiratory failure. *Crit Care*. 2016;20:109.
142. Fraser JF, Spooner AJ, Dunster KR, Anstey CM, Corley A. Nasal high flow oxygen therapy in patients with COPD reduces respiratory rate and tissue carbon dioxide while increasing tidal and end-expiratory lung volumes: a randomised crossover trial. *Thorax*. 2016;71:759–61.
143. Mauri T, Turrini C, Eronia N, Grasselli G, Volta CA, Bellani G, et al. Physiologic effects of high-flow nasal cannula in acute hypoxemic respiratory failure. *Am J Respir Crit Care Med*. 2017;195:1207–15.

144. Nagata K, Horie T, Chohnabayashi N, Jinta T, Tsugitomi R, Shiraki A, et al. Home high-flow nasal cannula oxygen therapy for stable hypercapnic COPD: a randomized clinical trial. *Am J Respir Crit Care Med*. 2022;206:1326–35.
145. Xia J, Gu S, Lei W, Zhang J, Wei H, Liu C, et al. High-flow nasal cannula versus conventional oxygen therapy in acute COPD exacerbation with mild hypercapnia: a multicenter randomized controlled trial. *Crit Care*. 2022;26:109.
146. Oczkowski S, Ergan B, Bos L, Chatwin M, Ferrer M, Gregoretti C, et al. ERS clinical practice guidelines: high-flow nasal cannula in acute respiratory failure. *Eur Respir J*. 2022;59.
147. Clinical indications for noninvasive positive pressure ventilation in chronic respiratory failure due to restrictive lung disease, COPD, and nocturnal hypoventilation – a consensus conference report. *Chest*. 1999;116:521–34.
148. Osadnik CR, Tee VS, Carson-Chahhoud KV, Picot J, Wedzicha JA, Smith BJ. Non-invasive ventilation for the management of acute hypercapnic respiratory failure due to exacerbation of chronic obstructive pulmonary disease. *Cochrane Database Syst Rev*. 2017;7:Cd004104.
149. Sellares J, Ferrer M, Anton A, Loureiro H, Bencosme C, Alonso R, et al. Discontinuing noninvasive ventilation in severe chronic obstructive pulmonary disease exacerbations: a randomised controlled trial. *Eur Respir J*. 2017;50:1601448.
150. Chandra D, Stamm JA, Taylor B, Ramos RM, Satterwhite L, Krishnan JA, et al. Out-comes of noninvasive ventilation for acute exacerbations of chronic obstructive pulmonary disease in the United States, 1998–2008. *Am J Respir Crit Care Med*. 2012;185:152–9.
151. Alqahtani JS, Njoku CM, Bereznicki B, Wimmer BC, Peterson GM, Kinsman L, et al. Risk factors for all-cause hospital readmission following exacerbation of COPD: a systematic review and meta-analysis. *Eur Respir Rev*. 2020;29: 190166.
152. Benzo R, Vickers K, Novotny PJ, Tucker S, Hoult J, Neuenfeldt P, et al. Health coaching and chronic obstructive pulmonary disease rehospitalization. A randomized study. *Am J Respir Crit Care Med*. 2016;194:672–80.
153. Gavish R, Levy A, Dekel OK, Karp E, Maimon N. The association between hospital readmission and pulmonologist follow-up visits in patients with COPD. *Chest*. 2015;148:375–81.
154. Oga T, Tsukino M, Hajiro T, Ikeda A, Nishimura K. Predictive properties of different multidimensional staging systems in patients with chronic obstructive pulmonary disease. *Int J Chron Obstruct Pulmon Dis*. 2011;6:521–6.
155. Spece LJ, Epler EM, Duan K, Donovan LM, Griffith MF, LaBedz S, et al. Reassessment of home oxygen prescription after hospitalization for chronic obstructive pulmonary disease. a potential target for de implementation. *Ann Am Thorac Soc*. 2021;18:426–32.

156. Puhan MA, Gimeno-Santos E, Scharplatz M, Troosters T, Walters EH, Steurer J. Pulmonary rehabilitation following exacerbations of chronic obstructive pulmonary disease. *Cochrane Database Syst Rev*. 2011;Cd005305.
157. Puhan MA, Gimeno-Santos E, Cates CJ, Troosters T. Pulmonary rehabilitation following exacerbations of chronic obstructive pulmonary disease. *Cochrane Database Syst Rev*. 2016;12:Cd005305.
158. Hoogendoorn M, Hoogenveen RT, Rutten-van Mölken MP, Vestbo J, Feenstra TL. Case fatality of COPD exacerbations: a meta-analysis and statistical modelling approach. *Eur Respir J*. 2011;37:508–15.
159. Guo Y, Zhang T, Wang Z, Yu F, Xu Q, Guo W, et al. Body mass index and mortality in chronic obstructive pulmonary disease: a dose–response meta-analysis. *Medicine (Baltimore)*. 2016;95:e4225.
160. Singanayagam A, Schembri S, Chalmers JD. Predictors of mortality in hospitalized adults with acute exacerbation of chronic obstructive pulmonary disease. *Ann Am Thorac Soc*. 2013;10:81–9.
161. Piquet J, Chavaillon JM, David P, Martin F, Blanchon F, Roche N. High-risk patients following hospitalisation for an acute exacerbation of COPD. *Eur Respir J*. 2013;42:946–55.
162. Beghe B, Clini E, Fabbri L. Chronic respiratory abnormalities in the multi-morbid frail elderly. *BRN Reviews*. 2017;3:247-66.
163. Divo MJ, Casanova C, Marin JM, Pinto-Plata VM, de-Torres JP, Zulueta JJ, et al. COPD comorbidities network. *Eur Respir J*. 2015;46:640–50.
164. Mannino DM, Thorn D, Swensen A, Holguin F. Prevalence and outcomes of diabetes, hypertension and cardiovascular disease in COPD. *Eur Respir J*. 2008;32:962–9.
165. de Torres JP, Marin JM, Casanova C, Cote C, Carrizo S, Cordoba-Lanus E, et al. Lung cancer in patients with chronic obstructive pulmonary disease: incidence and predicting factors. *Am J Respir Crit Care Med*. 2011;184:913–9.
166. Huang JT-J, Cant E, Keir HR, Barton AK, Kuzmanova E, Shuttleworth M, et al. Endotyping chronic obstructive pulmonary disease, bronchiectasis, and the “Chronic Obstructive Pulmonary Disease–Bronchiectasis Association”. *Am J Respir Crit Care Med*. 2022;206:417–26.
167. Soler X, Gaio E, Powell FL, Ramsdell JW, Loredó JS, Malhotra A, et al. High prevalence of obstructive sleep apnea in patients with moderate to severe chronic obstructive pulmonary disease. *Ann Am Thorac Soc*. 2015;12:1219–25.
168. Jorgensen NR, Schwarz P, Holme I, Henriksen BM, Petersen LJ, Backer V. The prevalence of osteoporosis in patients with chronic obstructive pulmonary disease: a cross sectional study. *Respir Med*. 2007;101:177–85.

169. Cebon Lipovec N, Beijers RJHCG, van den Borst B, Doehner W, Lainscak M, Schols AMWJ. The prevalence of metabolic syndrome in chronic obstructive pulmonary disease: a systematic review. *COPD*. 2016;13:399–406.
170. Hurst JR, Vestbo J, Anzueto A, Locantore N, Mullerova H, Tal-Singer R, et al. Susceptibility to exacerbation in chronic obstructive pulmonary disease. *N Engl J Med*. 2010;363:1128–38.
171. Ingebrigtsen TS, Marott JL, Vestbo J, Nordestgaard BG, Hallas J, Lange P. Gastroesophageal reflux disease and exacerbations in chronic obstructive pulmonary disease. *Respirology*. 2015;20:101–7.
172. Sasaki T, Nakayama K, Yasuda H, Yoshida M, Asamura T, Ohru T, et al. A randomized, single-blind study of lansoprazole for the prevention of exacerbations of chronic obstructive pulmonary disease in older patients. *J Am Geriatr Soc*. 2009;57:1453–7.
173. Baumeler L, Papakonstantinou E, Milenkovic B, Lacoma A, Louis R, Aerts JG, et al. Therapy with proton-pump inhibitors for gastroesophageal reflux disease does not reduce the risk for severe exacerbations in COPD. *Respirology*. 2016;21:883–90.
174. Putcha N, Fawzy A, Paul GG, Lambert AA, Psoter KJ, Sidhaye VK, et al. Anemia and adverse outcomes in a chronic obstructive pulmonary disease population with a high burden of comorbidities. An analysis from SPIROMICS. *Ann Am Thorac Soc*. 2018;15:710–7.
175. Nakamura A, Kasamatsu N, Hashizume I, Shirai T, Hanzawa S, Momiki S, et al. Effects of hemoglobin on pulmonary arterial pressure and pulmonary vascular resistance in patients with chronic emphysema. *Respiration*. 2000;67:502–6.
176. Samareh Fekri M, Torabi M, Azizi Shoul S, Mirzaee M. Prevalence and predictors associated with severe pulmonary hypertension in COPD. *Am J Emerg Med*. 2018;36:277–80.
177. Kent BD, Mitchell PD, McNicholas WT. Hypoxemia in patients with COPD: cause, effects, and disease progression. *Int J Chron Obstruct Pulmon Dis*. 2011;6:199–208.
178. Chambellan A, Chailleux E, Similowski T, Group AO. Prognostic value of the hematocrit in patients with severe COPD receiving long-term oxygen therapy. *Chest*. 2005;128:1201–8.
179. Hanania NA, Mullerova H, Locantore NW, Vestbo J, Watkins ML, Wouters EF, et al. Evaluation of CLIPSEsi determinants of depression in the ECLIPSE chronic obstructive pulmonary disease cohort. *Am J Respir Crit Care Med*. 2011;183:604–11.
180. Kunik ME, Roundy K, Veazey C, Soucek J, Richardson P, Wray NP, et al. Surprisingly high prevalence of anxiety and depression in chronic breathing disorders. *Chest*. 2005;127:1205–11.

181. Ng TP, Niti M, Tan WC, Cao Z, Ong KC, Eng P. Depressive symptoms and chronic obstructive pulmonary disease: effect on mortality, hospital readmission, symptom burden, functional status, and quality of life. *Arch Intern Med.* 2007;167:60–7.
182. Maurer J, Rebbapragada V, Borson S, Goldstein R, Kunik ME, Yohannes AM, et al. Anxiety and depression in COPD: current understanding, unanswered questions, and research needs. *Chest.* 2008;134:43S–56S.
183. Eisner MD, Blanc PD, Yelin EH, Katz PP, Sanchez G, Iribarren C, et al. Influence of anxiety on health outcomes in COPD. *Thorax.* 2010;65:229–34.
184. Chen W, Thomas J, Sadatsafavi M, FitzGerald JM. Risk of cardiovascular comorbidity in patients with chronic obstructive pulmonary disease: a systematic review and meta-analysis. *Lancet Respir Med.* 2015;3:631–9.
185. Cleutjens FA, Franssen FM, Spruit MA, Vanfleteren LE, Gijzen C, Dijkstra JB, et al. Domain-specific cognitive impairment in patients with COPD and control subjects. *Int J Chron Obstruct Pulmon Dis.* 2017;12:1–11.
186. Cleutjens F, Spruit MA, Ponds R, Vanfleteren L, Franssen FME, Gijzen C, et al. Cognitive impairment and clinical characteristics in patients with chronic obstructive pulmonary disease. *Chron Respir Dis.* 2018;15:91–102.
187. Fried LP, Tangen CM, Walston J, Newman AB, Hirsch C, Gottdiener J, et al. Frailty in older adults: evidence for a phenotype. *J Gerontol A Biol Sci Med Sci.* 2001;56:M146–56.
188. Talic S, Shah S, Wild H, Gasevic D, Maharaj A, Ademi Z, et al. Effectiveness of public health measures in reducing the incidence of covid-19 SARS-CoV-2 transmission, and covid-19 mortality: systematic review and meta-analysis. *BMJ.* 2021;375:e068302.
189. Halpin DMG, Criner GJ, Papi A, Singh D, Anzueto A, Martinez FJ, et al. Global initiative for the diagnosis, management, and prevention of chronic obstructive lung disease: the 2020 GOLD Science Committee Report on COVID-19 & COPD. *Am J Respir Crit Care Med.* 2021;203:24–36.
190. Alqahtani JS, Oyelade T, Aldhahir AM, Mendes RG, Alghamdi SM, Miravittles M, et al. Reduction in hospitalised COPD exacerbations during COVID-19: a systematic review and meta-analysis. *PLoS One.* 2021;16:e0255659.
191. Halpin DMG, Rabe AP, Loke WJ, Grieve S, Daniele P, Hwang S, et al. Epidemiology healthcare resource utilization, and mortality of asthma and COPD in COVID-19: a systematic literature review and meta-analyses. *J Asthma Allergy.* 2022;15:811–25.
192. Lipson DA, Crim C, Criner GJ, Day NC, Dransfield MT, Halpin DMG, et al. Reduction in all-cause mortality with fluticasone furoate/umeclidinium/vilanterol in COPD patients. *Am J Respir Crit Care Med.* 2020;201:1508–16.

193. Anthonisen NR, Skeans MA, Wise RA, Manfreda J, Kanner RE, Connett JE. The effects of a smoking cessation intervention on 14.5-year mortality: a randomized clinical trial. *Ann Intern Med*. 2005;142:233–9.
194. Rysø CK, Godtfredsen NS, Kofod LM, Lavesen M, Mogensen L, Tobberup R, et al. Lower mortality after early supervised pulmonary rehabilitation following COPD-exacerbations: a systematic review and meta-analysis. *BMC Pulm Med*. 2018;18:154.
195. Nocturnal Oxygen Therapy Trial Group. Continuous or nocturnal oxygen therapy in hypoxemic chronic obstructive lung disease. A clinical trial. *Ann Intern Med*. 1980;93:391–8.
196. Report of the Medical Research Council Working Party. Long term domiciliary oxygen therapy in chronic hypoxic cor pulmonale complicating chronic bronchitis and emphysema. *Lancet*. 1981;1:681–5.
197. Kohnlein T, Windisch W, Kohler D, Drabik A, Geiseler J, Hartl S, et al. Non-invasive positive pressure ventilation for the treatment of severe stable chronic obstructive pulmonary disease: a prospective, multicentre, randomised, controlled clinical trial. *Lancet Respir Med*. 2014;2:698–705.
198. National Emphysema Treatment Trial Research Group. A randomized trial comparing lung-volume-reduction surgery with medical therapy for severe emphysema. *N Engl J Med*. 2003;348:2059–73.

---

## Figuras

---

# Propuesta de clasificación nosológica (etiotipos) de la EPOC

Figura 1

| Clasificación                                                | Descripción                                                                                                                                                                                                                   |
|--------------------------------------------------------------|-------------------------------------------------------------------------------------------------------------------------------------------------------------------------------------------------------------------------------|
| EPOC genética (EPOC-G)                                       | Déficit de $\alpha_1$ -antitripsina (AATD).<br>Otras variantes genéticas con poco efecto individual pero que pueden generar sinergias si se dan simultáneamente.                                                              |
| EPOC secundaria a desarrollo pulmonar anómalo (EPOC-D)       | Antecedentes de problemas neonatales:<br>p. ej., prematuridad y peso bajo al nacer, entre otros.                                                                                                                              |
| EPOC ambiental                                               |                                                                                                                                                                                                                               |
| EPOC por tabaquismo (COPD-S)                                 | <ul style="list-style-type: none"><li>• Exposición al humo del tabaco, también durante la gestación o por tabaquismo pasivo.</li><li>• Vapeo o consumo de cigarrillos electrónicos.</li><li>• Consumo de marihuana.</li></ul> |
| EPOC por exposición a la contaminación y la biomasa (EPOC-C) | Exposición a la contaminación intradoméstica, contaminación del aire ambiente, humo de incendios forestales, riesgos laborales.                                                                                               |
| EPOC secundaria a infecciones (EPOC-I)                       | Infecciones en la infancia, EPOC asociada a tuberculosis, EPOC asociada al VIH.                                                                                                                                               |
| EPOC y asma (EPOC-A)                                         | Particularmente asma infantil.                                                                                                                                                                                                |
| EPOC de causa desconocida (EPOC-CD)                          | Idiopática.                                                                                                                                                                                                                   |

Nota: Clasificación adaptada de Celli *et al.* (2022) y Stolz *et al.* (2022). Reproducida con autorización de [www.goldcopd.org](http://www.goldcopd.org).



# Herramienta de evaluación inicial GOLD ABE

Figura 2

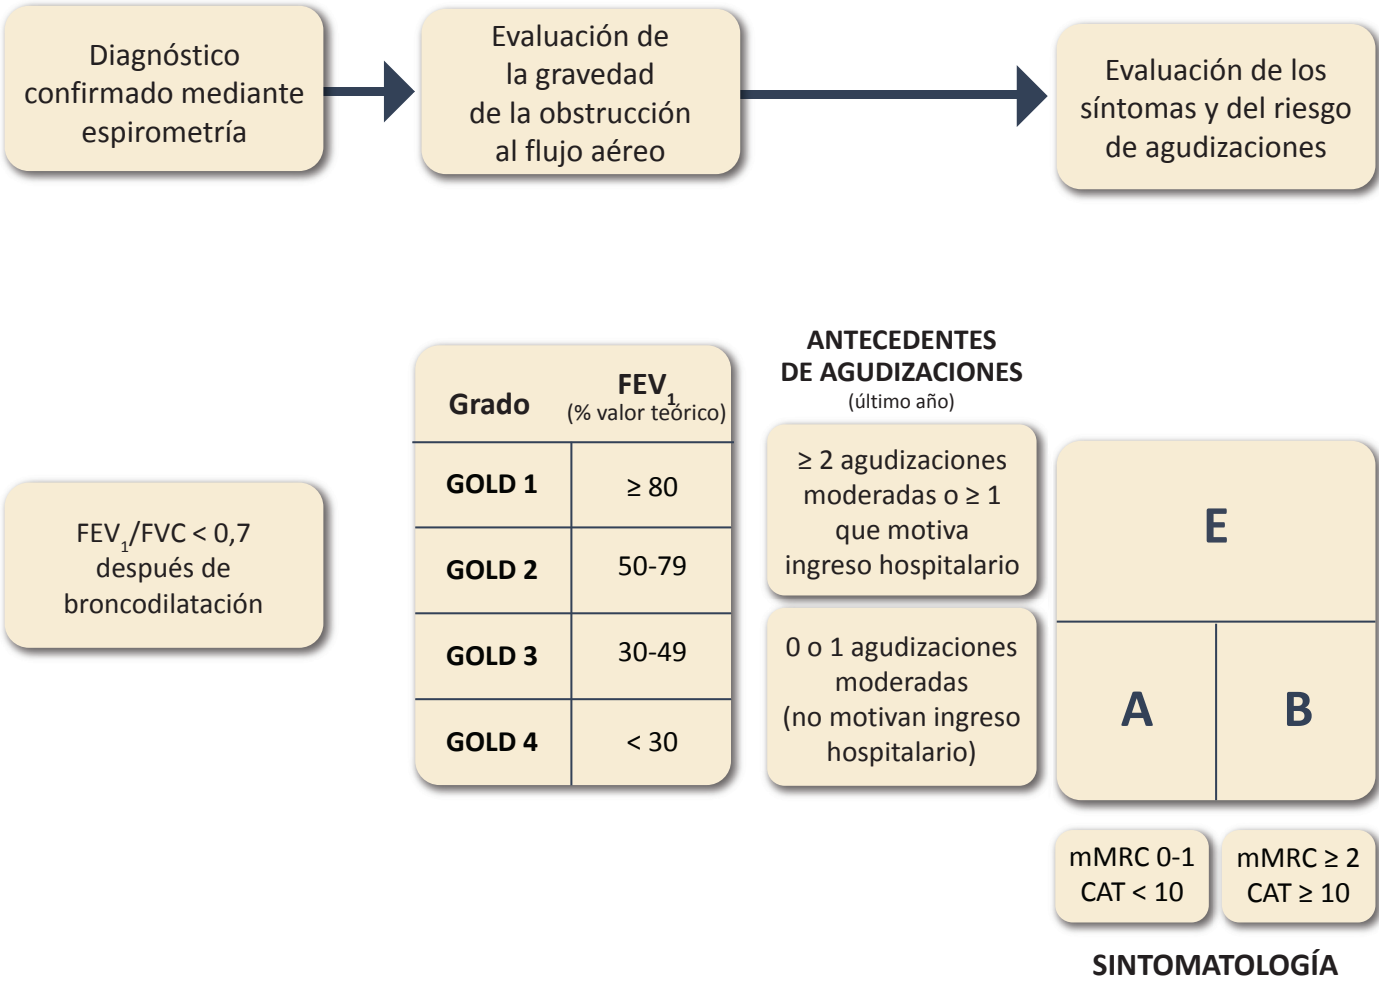

Siglas: CAT: cuestionario *COPD Assessment Test*; FVC: capacidad vital forzada; mMRC: escala de disnea modificada del Medical Research Council; FEV<sub>1</sub>: volumen espirado en el primer segundo de una maniobra de espiración forzada. Reproducida con autorización de [www.goldcopd.org](http://www.goldcopd.org).

# Tratamiento farmacológico inicial recomendado

Figura 3

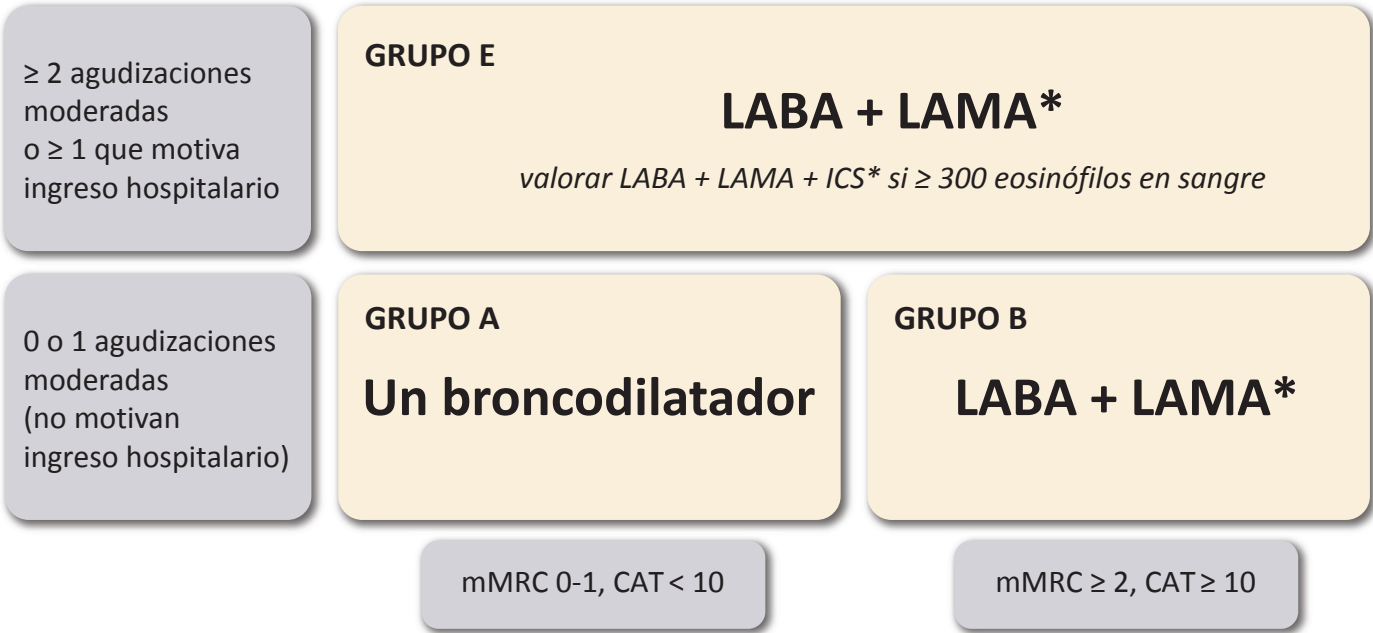

Los antecedentes de agudizaciones se refieren al último año.

\* El tratamiento con un solo inhalador es más cómodo y eficaz que con varios.

Siglas: CAT: cuestionario *COPD Assessment Test*; ICS: corticoide inhalado; LABA: agonista  $\beta_2$  de acción prolongada; LAMA: antagonista muscarínico de acción prolongada; mMRC: escala de disnea modificada del Medical Research Council. Reproducida con autorización de [www.goldcopd.org](http://www.goldcopd.org).

# Tratamiento farmacológico durante el seguimiento del paciente

Figura 4

1 SI LA RESPUESTA AL TRATAMIENTO INICIAL ES ADECUADA, MANTENERLO.

2 EN CASO CONTRARIO:

- Comprobar el cumplimiento terapéutico, la técnica empleada con el inhalador y las posibles comorbilidades interferentes.
- Valorar el rasgo tratable predominante (disnea o agudizaciones):  
– Si es preciso tratar los dos, seguir el algoritmo correspondiente a las agudizaciones.
- Partiendo de la casilla que corresponda al tratamiento actual del paciente, seguir las indicaciones.
- Valorar la respuesta, ajustar y revisar.
- Estas recomendaciones no dependen de la evaluación ABE en el momento del diagnóstico.

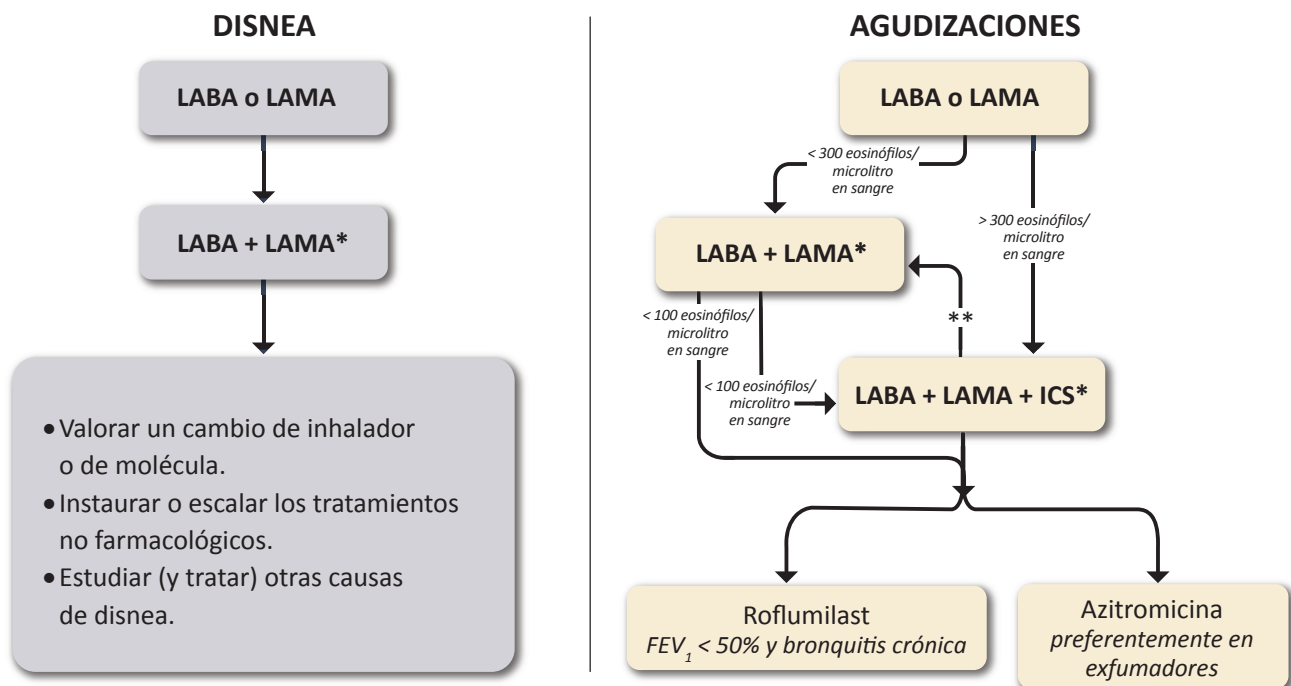

\* El tratamiento con un solo inhalador es más cómodo y eficaz que con varios.

\*\* Valorar desescalar los ICS si hay neumonía u otros efectos secundarios importantes. Si la cifra de eosinófilos en sangre es  $\geq 300$  por microlitro, es más probable que una desescalada se asocie a nuevas agudizaciones.

Las agudizaciones denotan el número de agudizaciones por año.

*Siglas:* ICS: corticoide inhalado; LABA: agonista  $\beta_2$  de acción prolongada; LAMA: antagonista muscarínico de acción prolongada; FEV<sub>1</sub>: volumen espirado en el primer segundo de una maniobra de espiración forzada. Reproducida con autorización de [www.goldcopd.org](http://www.goldcopd.org).

## Factores a tener en cuenta cuando se añade un ICS

### a los broncodilatadores de acción prolongada

(téngase en cuenta que la situación es diferente cuando se valora retirar el ICS)

Figura 5

#### MUY A FAVOR

Ingresos hospitalarios por agudizaciones<sup>#</sup>

≥ 2 agudizaciones moderadas por año<sup>#</sup>

Eosinófilos en sangre: ≥ 300 por microlitro.

Antecedentes o presencia actual de asma.

#### A FAVOR

Agudizaciones de la EPOC: 1 moderada por año.<sup>#</sup>

Eosinófilos en sangre: entre 100 y < 300 por microlitro.

#### EN CONTRA

Neumonías recurrentes.

Menos de 100 eosinófilos por microlitro en sangre.

Antecedentes de infecciones por micobacterias.

<sup>#</sup> A pesar de seguir tratamiento de mantenimiento con un broncodilatador de acción prolongada (véanse la figura 4 y la tabla 4.3 del informe GOLD).

\* La cifra de eosinófilos debe entenderse como un espectro continuo; los valores citados son aproximados; la cifra de eosinófilos puede fluctuar con el tiempo.

Reproducida con autorización de [www.goldcopd.org](http://www.goldcopd.org).

Siglas: ICS: corticoesteroide inhalado.

# Estudios que avalan la reducción de la mortalidad con farmacoterapia y tratamiento no farmacológico en la EPOC

Figura 6

| Tratamiento                                  | RCT* | Efecto del tratamiento sobre la mortalidad                                                                                                                                           | Características de los pacientes                                                                                  |
|----------------------------------------------|------|--------------------------------------------------------------------------------------------------------------------------------------------------------------------------------------|-------------------------------------------------------------------------------------------------------------------|
| <b>Farmacoterapia</b>                        |      |                                                                                                                                                                                      |                                                                                                                   |
| LABA + LAMA + ICS <sup>(1)</sup>             | Sí   | Reducción del riesgo relativo comparando triterapia con biterapia con LABD:<br>IMPACT: HR 0,72 (IC 95%: 0,53-0,99) <sup>1a</sup><br>ETHOS: HR 0,51 (IC 95%: 0,33-0,80) <sup>1b</sup> | Sintomáticos, con antecedentes de agudizaciones frecuentes o graves.                                              |
| <b>Tratamiento no farmacológico</b>          |      |                                                                                                                                                                                      |                                                                                                                   |
| Abandono del hábito tabáquico <sup>(2)</sup> | Sí   | HR del grupo de tratamiento habitual comparado con el grupo de intervención (abandono del hábito tabáquico)<br>HR de 1,18 (IC 95%: 1,02, 1,37) <sup>2</sup>                          | Asintomáticos o sintomatología leve.                                                                              |
| Rehabilitación pulmonar (PR) <sup>(3)#</sup> | Sí   | Ensayos antiguos: RR 0,28 (IC 95%: 0,10-0,84) <sup>3a</sup><br>Ensayos nuevos: RR de 0,68 (IC 95%: 0, 28-1,67) <sup>3b</sup>                                                         | Hospitalizados por agudizaciones de la EPOC (durante la hospitalización o en las ≤ 4 semanas siguientes al alta). |
| Oxigenoterapia crónica (ODC) <sup>(4)</sup>  | Sí   | NOTT, ≥ 19 h de oxígeno continuo frente a ≤ 13 h: reducción 50% <sup>4a</sup><br>MRC: ≥ 15 h frente a no administración de oxígeno: reducción 50% <sup>4b</sup>                      | P <sub>a</sub> O <sub>2</sub> ≤ 55 o < 60 mm Hg con <i>cor pulmonale</i> o policitemia secundaria.                |
| NPPV <sup>(5)</sup>                          | Sí   | 12% en NPPV (con IPAP alto) y 33% en el control<br>HR 0,24; IC 95%: 0,11-0,49) <sup>5</sup>                                                                                          | EPOC estable con hipercapnia marcada.                                                                             |
| LVRS <sup>(6)</sup>                          | Sí   | 0,07 decesos por año-persona (LVRS) frente a 0,15 decesos por año-persona (UC) RR de muerte: 0,47 ( <i>p</i> = 0,005) <sup>6</sup>                                                   | Enfisema lóbulo superior y escasa capacidad de esfuerzo.                                                          |

\*Ensayos aleatorizados y controlados con análisis predefinido de la mortalidad (como variable principal o secundaria). #Los resultados inconcluyentes probablemente se deban a diferencias en los programas de rehabilitación pulmonar entre los diferentes pacientes y entornos.

(1) a) Estudio IMPACT (Lipson *et al.*, 2020) y b) ETHOS (Martínez *et al.*, 2021). (2) *Lung Health Study* (Anthonisen *et al.*, 2005). (3) a) Puhan *et al.*, 2011 y b) Puhan *et al.*, 2016. 4) a) Estudio NOTT (NOTT, 1980) y b) estudio del MRC (MRC, 1981). 5) Ensayo de Kohlein *et al.* (2014). 6) Ensayo NETT (Fishman *et al.*, 2003).

**Síglas y abreviaturas:** EAC: ensayos aleatorizados y controlados; HR: cociente de riesgos instantáneos (*hazard ratio*); IC: intervalo de confianza; ICS: corticoesteroide inhalado; IPAP: presión positiva inspiratoria en la vía aérea (*inspiratory positive airway pressure*); LABA: agonista β<sub>2</sub> de acción prolongada; LABD: broncodilatador de acción prolongada; LAMA: antagonista muscarínico de acción prolongada; LVRS: cirugía de reducción del volumen pulmonar; MRC: Medical Research Council o escala de disnea del MRC; NETT: *National Emphysema Treatment Trial*; NOTT: *Nocturnal Oxygen Therapy Trial*; NPPV: ventilación no invasiva con presión positiva; ODC: oxigenoterapia crónica; P<sub>a</sub>O<sub>2</sub>: presión parcial arterial de oxígeno; PR: rehabilitación pulmonar; RCT: ensayos aleatorizados y controlados (*randomized and controlled trials*); RR: riesgo relativo; UC: grupo de tratamiento habitual (control). Reproducida con la autorización de [www.goldcopd.org](http://www.goldcopd.org).

# Tratamiento del enfisema avanzado

Figura 7

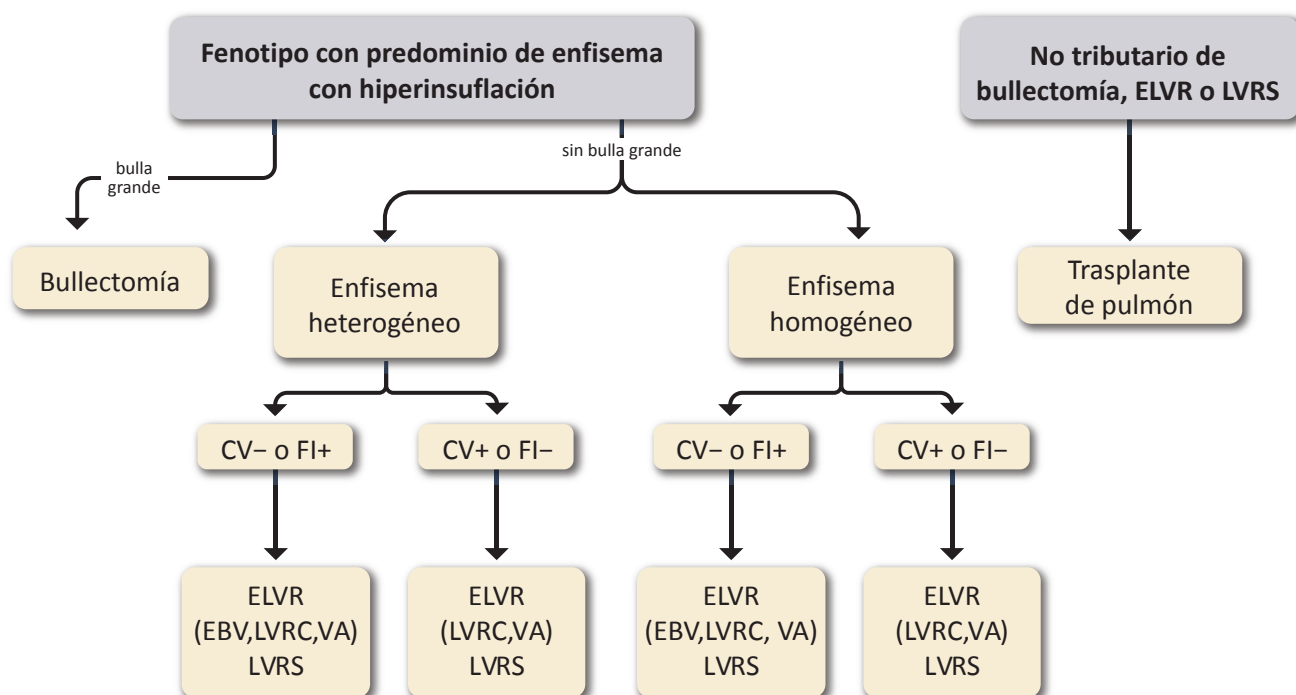

**Nota:** No todos los tratamientos están disponibles en todos los países. No se conocen los resultados a largo plazo de la reducción endoscópica del volumen pulmonar ni se han hecho comparaciones directas con la cirugía de reducción de volumen. Enfisema «homogéneo» es el que tiene una diferencia < 10% en la destrucción enfisematosa entre el lóbulo tratado y el lóbulo ipsilateral no tratado, determinado mediante TAC torácico cuantitativa. Si la diferencia es > 10%, se considera enfisema «heterogéneo».

**Siglas y abreviaturas:** CV: ventilación colateral determinada mediante el sistema Chartis; EBV: válvula endobronquial; ELVR: reducción endoscópica del volumen pulmonar; FI+: integridad de la fisura > 90% mediante TAC de alta resolución; FI-: integridad de la fisura < 90% mediante TAC de alta resolución; LVRC: reducción endoscópica del volumen pulmonar mediante espiral; LVRS: cirugía de reducción del volumen pulmonar; VA: ablación mediante vapor. Reproducida con autorización de [www.goldcopd.org](http://www.goldcopd.org).

Modificado de Vogelmeier, *AJRCCM*, 2017.

# Clasificación de la gravedad de las agudizaciones de la EPOC

Figura 8

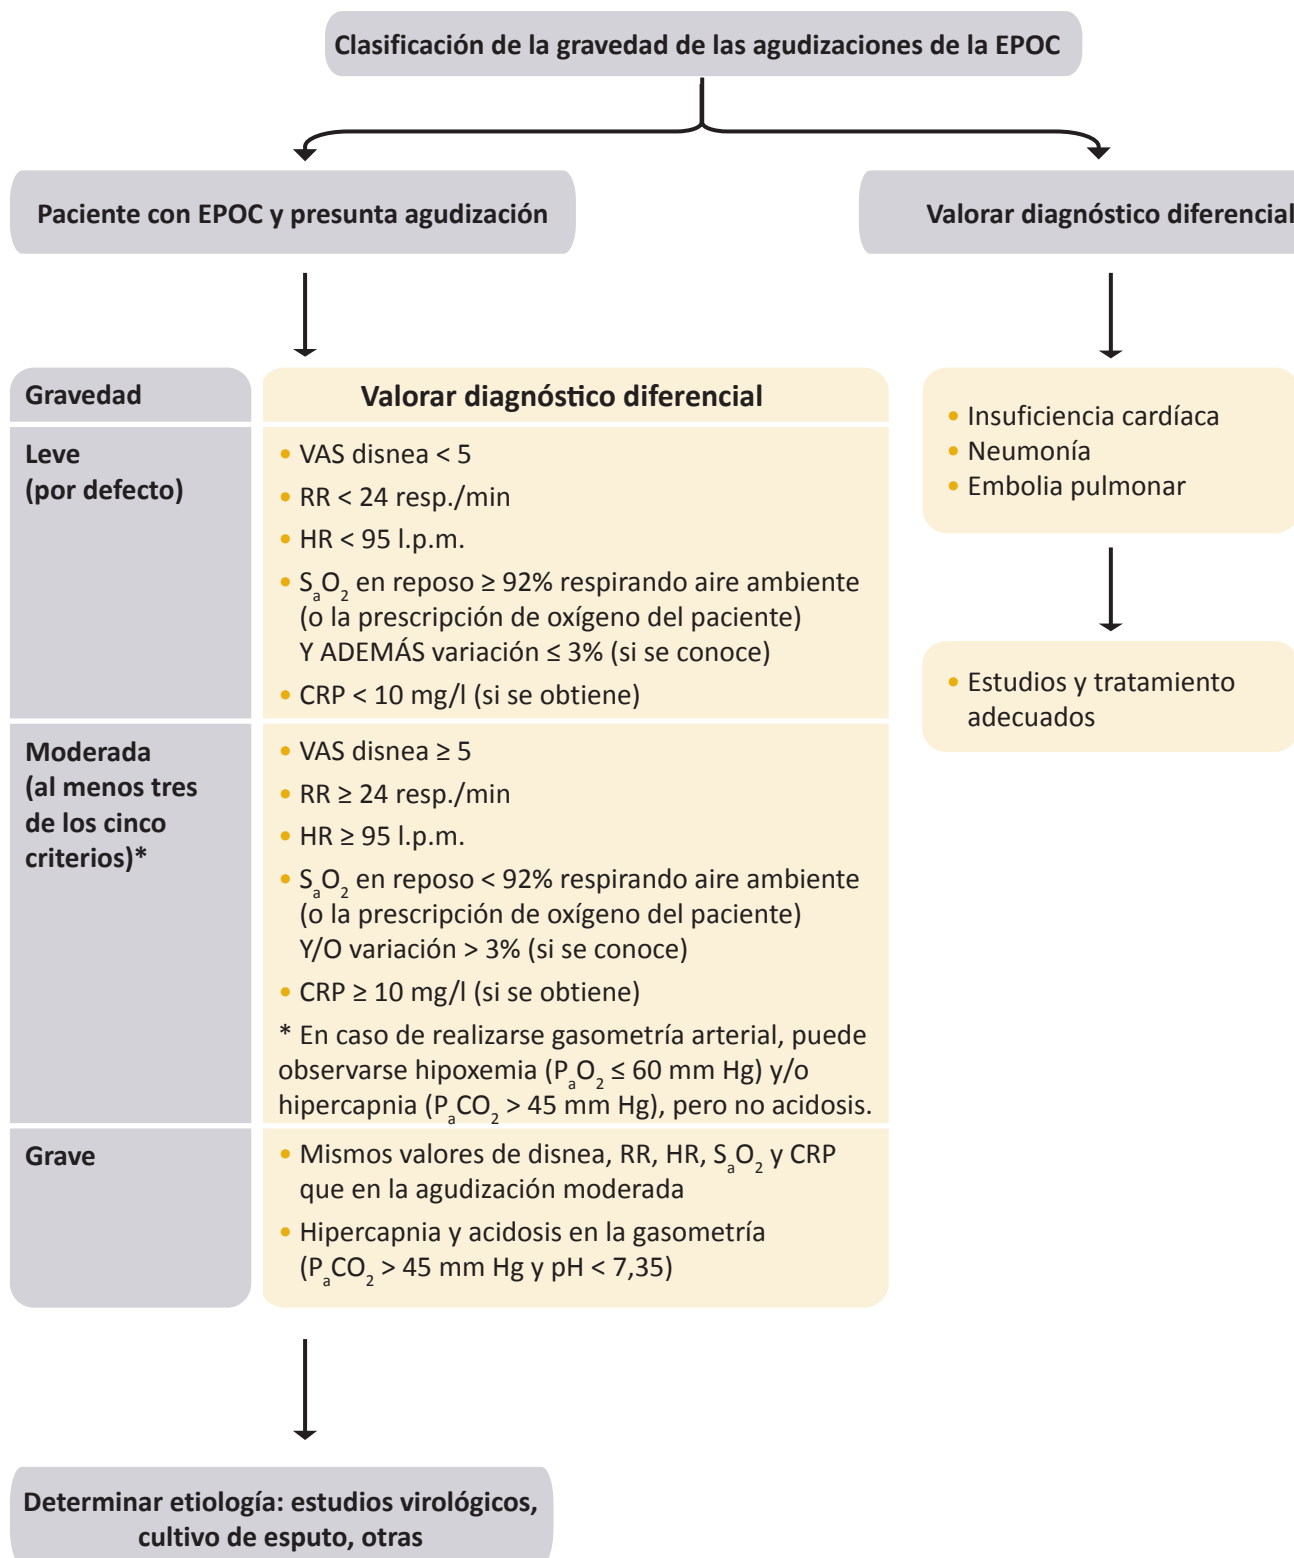

Adaptado a partir de: Propuesta de Roma (Celli *et al.*, 2021), *American Journal of Critical Care Medicine* 204 (11): 1251-8.

**Siglas y abreviaturas:** CRP: proteína C-reactiva; HR: frecuencia cardíaca; l.p.m.: latidos por minuto; P<sub>a</sub>CO<sub>2</sub>: presión parcial arterial de dióxido de carbono; P<sub>a</sub>O<sub>2</sub>: presión parcial arterial de oxígeno; resp.: respiraciones; RR: frecuencia respiratoria; S<sub>a</sub>O<sub>2</sub>: saturación arterial de oxígeno; VAS: escala visual analógica.

Reproducida con la autorización de [www.goldcopd.org](http://www.goldcopd.org).
